# Supplementary material for: B fibers are the best predictors of cardiac activity during Vagus nerve stimulation: Qing, vagal B fiber activation and cardiac effects
Source: PubMed Central journal article supplement (PMC7098216; doi:10.1186/s42234-018-0005-8), 2018-04-20

## The SAS System

| Obs | Rat  | Q    | A       | B       | C       | HR_norm | SV      | EF      | FS      | CO      | R166dummy | R172dummy |
|-----|------|------|---------|---------|---------|---------|---------|---------|---------|---------|-----------|-----------|
| 1   | R166 | 0.0  | 0.00535 | 0.06039 | 0.03239 | 0.99852 | 131.260 | 61.4470 | 33.7710 | 47.1893 | 1         | 0         |
| 2   | R166 | 5.0  | 0.02041 | 0.06979 | 0.03556 | 0.99732 | 121.354 | 67.1808 | 38.2485 | 43.5753 | 1         | 0         |
| 3   | R166 | 10.0 | 0.39867 | 0.08257 | 0.31984 | 0.99465 | 121.250 | 64.9660 | 36.6998 | 43.4215 | 1         | 0         |
| 4   | R166 | 15.0 | 0.88792 | 0.20246 | 0.74473 | 1.00000 | 119.036 | 68.8875 | 39.5930 | 42.8580 | 1         | 0         |
| 5   | R166 | 20.0 | 0.74587 | 0.14231 | 0.59209 | 0.99483 | 129.646 | 63.4928 | 35.5073 | 46.4363 | 1         | 0         |
| 6   | R166 | 25.0 | 0.92030 | 0.14423 | 0.57908 | 0.99854 | 142.822 | 70.6230 | 40.8575 | 51.3468 | 1         | 0         |
| 7   | R166 | 30.0 | 0.69519 | 0.56922 | 1.00000 | 0.68287 | 126.803 | 61.5230 | 34.1528 | 31.1757 | 1         | 0         |
| 8   | R166 | 35.0 | 0.70960 | 0.53274 | 0.90895 | 0.91528 | 131.257 | 68.9973 | 39.4458 | 43.2543 | 1         | 0         |
| 9   | R166 | 40.0 | 0.94707 | 0.50275 | 0.76651 | 0.94888 | 121.380 | 68.7243 | 39.1190 | 41.4678 | 1         | 0         |
| 10  | R166 | 45.0 | 1.00000 | 0.53042 | 0.76438 | 0.95472 | 128.662 | 69.1768 | 39.7125 | 44.2259 | 1         | 0         |
| 11  | R166 | 50.0 | 0.76370 | 0.71267 | 0.89573 | 0.88682 | 100.794 | 63.5750 | 35.2300 | 32.1825 | 1         | 0         |
| 12  | R166 | 60.0 | 0.72046 | 1.00000 | 0.95845 | 0.84390 | 122.929 | 62.1208 | 34.2440 | 37.3505 | 1         | 0         |
| 13  | R172 | 0.0  | 0.01173 | 0.10752 | 0.02200 | 1.00000 | 132.169 | 82.7970 | 52.2170 | 51.0218 | 0         | 1         |
| 14  | R172 | 5.0  | 0.00531 | 0.10524 | 0.01206 | 0.98423 | 137.413 | 83.8790 | 53.5790 | 52.2097 | 0         | 1         |
| 15  | R172 | 10.0 | 0.13906 | 0.08534 | 0.08581 | 0.98571 | 145.015 | 82.1685 | 51.7200 | 55.1805 | 0         | 1         |
| 16  | R172 | 15.0 | 0.43028 | 0.06929 | 0.36870 | 0.99131 | 136.755 | 81.8165 | 51.2520 | 52.3333 | 0         | 1         |
| 17  | R172 | 20.0 | 0.91618 | 0.03695 | 0.37952 | 0.96630 | 156.420 | 81.6950 | 51.3280 | 58.3485 | 0         | 1         |
| 18  | R172 | 25.0 | 1.00000 | 0.00244 | 0.41000 | 0.95835 | 150.352 | 82.2075 | 51.8045 | 55.6239 | 0         | 1         |
| 19  | R172 | 30.0 | 0.74558 | 0.00000 | 0.67493 | 0.93810 | 141.507 | 83.3640 | 53.0710 | 51.2451 | 0         | 1         |
| 20  | R172 | 35.0 | 0.58997 | 0.68243 | 0.55711 | 0.91558 | 134.847 | 79.8325 | 49.1470 | 47.6610 | 0         | 1         |
| 21  | R172 | 40.0 | 0.66879 | 0.57698 | 0.71459 | 0.85515 | 138.704 | 77.3395 | 46.7790 | 45.7885 | 0         | 1         |
| 22  | R172 | 45.0 | 0.64872 | 0.46241 | 0.41247 | 0.93196 | 121.903 | 81.0085 | 50.2685 | 43.8569 | 0         | 1         |
| 23  | R172 | 50.0 | 0.62204 | 0.52189 | 1.00000 | 0.86611 | 132.897 | 76.8545 | 46.2345 | 44.4338 | 0         | 1         |
| 24  | R172 | 55.0 | 0.44858 | 1.00000 | 0.54508 | 0.75010 | 144.396 | 75.2225 | 44.8945 | 41.8119 | 0         | 1         |
| 25  | R172 | 60.0 | 0.48311 | 0.99698 | 0.59676 | 0.75062 | 136.896 | 76.8670 | 46.3570 | 39.6677 | 0         | 1         |
| 26  | R173 | 5.0  | 0.28085 | 0.04933 | 0.27878 | 1.00000 | 147.198 | 85.0440 | 55.0285 | 54.3655 | 0         | 0         |
| 27  | R173 | 25.0 | 0.85863 | 0.74140 | 0.68526 | 0.77253 | 170.179 | 76.2935 | 46.1825 | 48.5559 | 0         | 0         |
| 28  | R173 | 15.0 | 1.00000 | 0.01148 | 0.89345 | 0.93848 | 166.187 | 79.9440 | 49.5775 | 57.6028 | 0         | 0         |
| 29  | R173 | 32.5 | 0.76535 | 1.00000 | 0.88794 | 0.66178 | 154.410 | 72.9800 | 42.9735 | 37.7406 | 0         | 0         |
| 30  | R173 | 17.5 | 0.93502 | 0.06949 | 0.95593 | 0.79528 | 163.735 | 79.0720 | 48.6940 | 48.0935 | 0         | 0         |
| 31  | R173 | 10.0 | 0.92272 | 0.00229 | 0.95693 | 0.96977 | 166.359 | 81.7980 | 51.5445 | 59.5849 | 0         | 0         |
| 32  | R173 | 0.0  | 0.02082 | 0.02716 | 0.00666 | 0.95800 | 161.142 | 80.3135 | 49.9415 | 57.0158 | 0         | 0         |
| 33  | R173 | 30.0 | 0.75791 | 0.89194 | 0.94972 | 0.67151 | 162.247 | 74.7455 | 44.5895 | 40.2394 | 0         | 0         |
| 34  | R173 | 20.0 | 0.88070 | 0.15301 | 1.00000 | 0.89390 | 143.593 | 77.8110 | 47.2730 | 47.4075 | 0         | 0         |
| 35  | R173 | 22.5 | 0.83798 | 0.36393 | 0.96928 | 0.87437 | 156.708 | 79.8320 | 49.4045 | 50.6067 | 0         | 0         |
| 36  | R173 | 27.5 | 0.79134 | 0.77546 | 0.93804 | 0.73637 | 165.471 | 71.4520 | 41.7965 | 45.0031 | 0         | 0         |
| 37  | R173 | 25.0 | 0.80145 | 0.50278 | 0.99661 | 0.86200 | 157.215 | 74.3525 | 44.2165 | 50.0526 | 0         | 0         |

# The SAS System

The REG Procedure  
Model: MODEL1  
Dependent Variable: HR\_norm

|                             |    |
|-----------------------------|----|
| Number of Observations Read | 37 |
| Number of Observations Used | 37 |

| Analysis of Variance |    |                |             |         |        |
|----------------------|----|----------------|-------------|---------|--------|
| Source               | DF | Sum of Squares | Mean Square | F Value | Pr > F |
| Model                | 3  | 0.21432        | 0.07144     | 13.51   | <.0001 |
| Error                | 33 | 0.17455        | 0.00529     |         |        |
| Corrected Total      | 36 | 0.38887        |             |         |        |

|                |         |          |        |
|----------------|---------|----------|--------|
| Root MSE       | 0.07273 | R-Square | 0.5511 |
| Dependent Mean | 0.89848 | Adj R-Sq | 0.5103 |
| Coeff Var      | 8.09463 |          |        |

| Parameter Estimates |    |                    |                |         |         |
|---------------------|----|--------------------|----------------|---------|---------|
| Variable            | DF | Parameter Estimate | Standard Error | t Value | Pr >  t |
| Intercept           | 1  | 0.92302            | 0.02539        | 36.36   | <.0001  |
| Q                   | 1  | -0.00410           | 0.00074463     | -5.50   | <.0001  |
| R166dummy           | 1  | 0.12604            | 0.03040        | 4.15    | 0.0002  |
| R172dummy           | 1  | 0.11477            | 0.03021        | 3.80    | 0.0006  |

# The SAS System

The REG Procedure  
Model: MODEL1  
Dependent Variable: HR\_norm

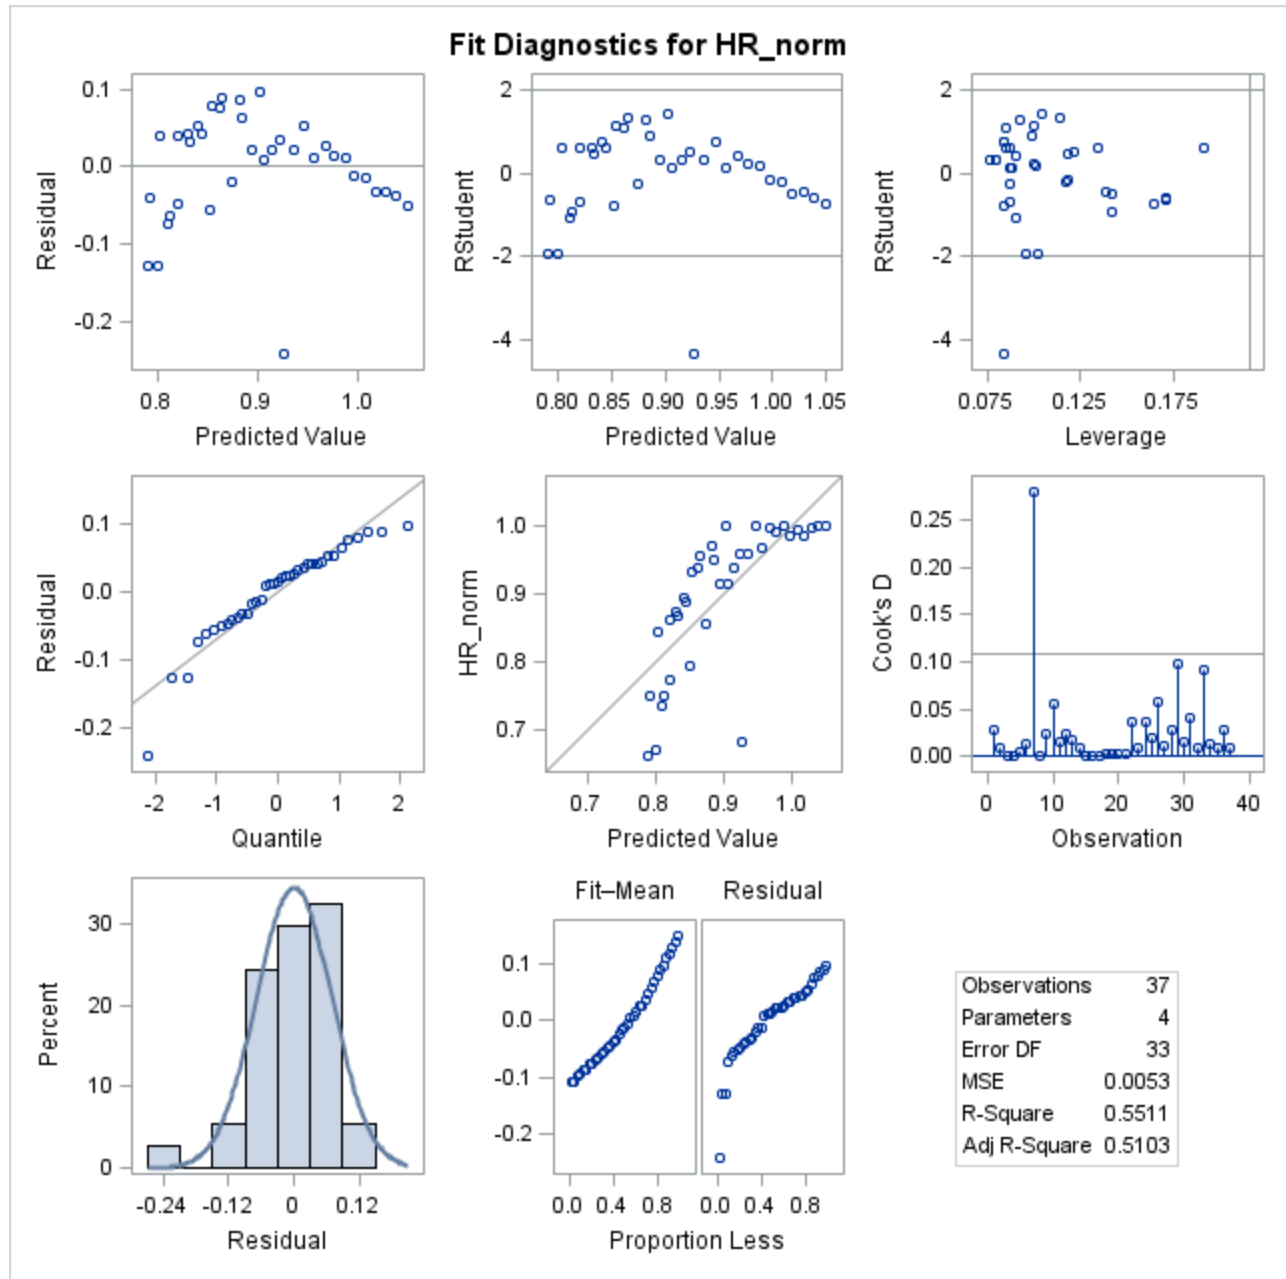

### Residual by Regressors for HR\_norm

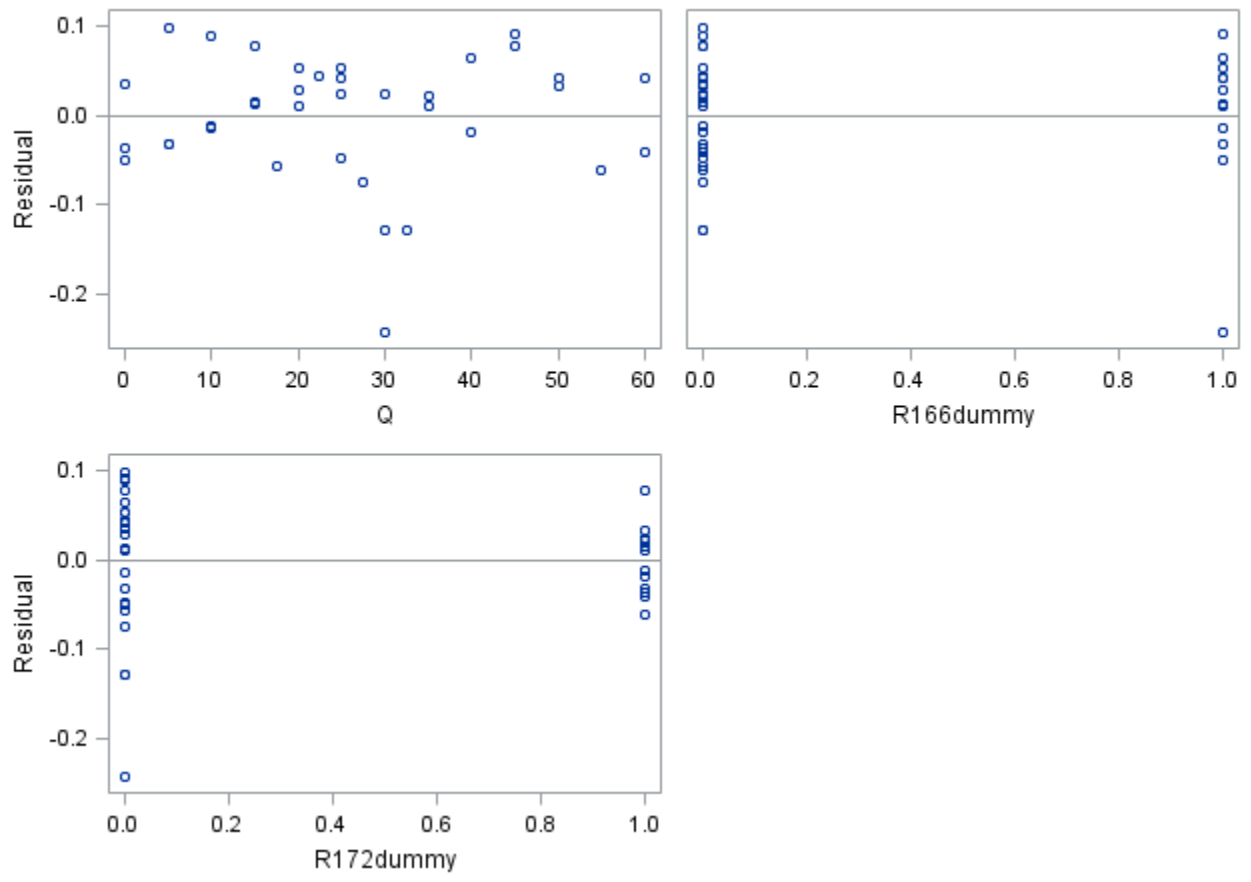

# The SAS System

The REG Procedure  
Model: MODEL1  
Dependent Variable: HR\_norm

|                             |    |
|-----------------------------|----|
| Number of Observations Read | 37 |
| Number of Observations Used | 37 |

| Analysis of Variance |    |                |             |         |        |
|----------------------|----|----------------|-------------|---------|--------|
| Source               | DF | Sum of Squares | Mean Square | F Value | Pr > F |
| Model                | 3  | 0.07390        | 0.02463     | 2.58    | 0.0701 |
| Error                | 33 | 0.31498        | 0.00954     |         |        |
| Corrected Total      | 36 | 0.38887        |             |         |        |

|                |          |          |        |
|----------------|----------|----------|--------|
| Root MSE       | 0.09770  | R-Square | 0.1900 |
| Dependent Mean | 0.89848  | Adj R-Sq | 0.1164 |
| Coeff Var      | 10.87359 |          |        |

| Parameter Estimates |    |                    |                |         |         |
|---------------------|----|--------------------|----------------|---------|---------|
| Variable            | DF | Parameter Estimate | Standard Error | t Value | Pr >  t |
| Intercept           | 1  | 0.90114            | 0.04848        | 18.59   | <.0001  |
| A                   | 1  | -0.07678           | 0.05345        | -1.44   | 0.1603  |
| R166dummy           | 1  | 0.08355            | 0.04015        | 2.08    | 0.0453  |
| R172dummy           | 1  | 0.05337            | 0.04086        | 1.31    | 0.2006  |

# The SAS System

The REG Procedure  
Model: MODEL1  
Dependent Variable: HR\_norm

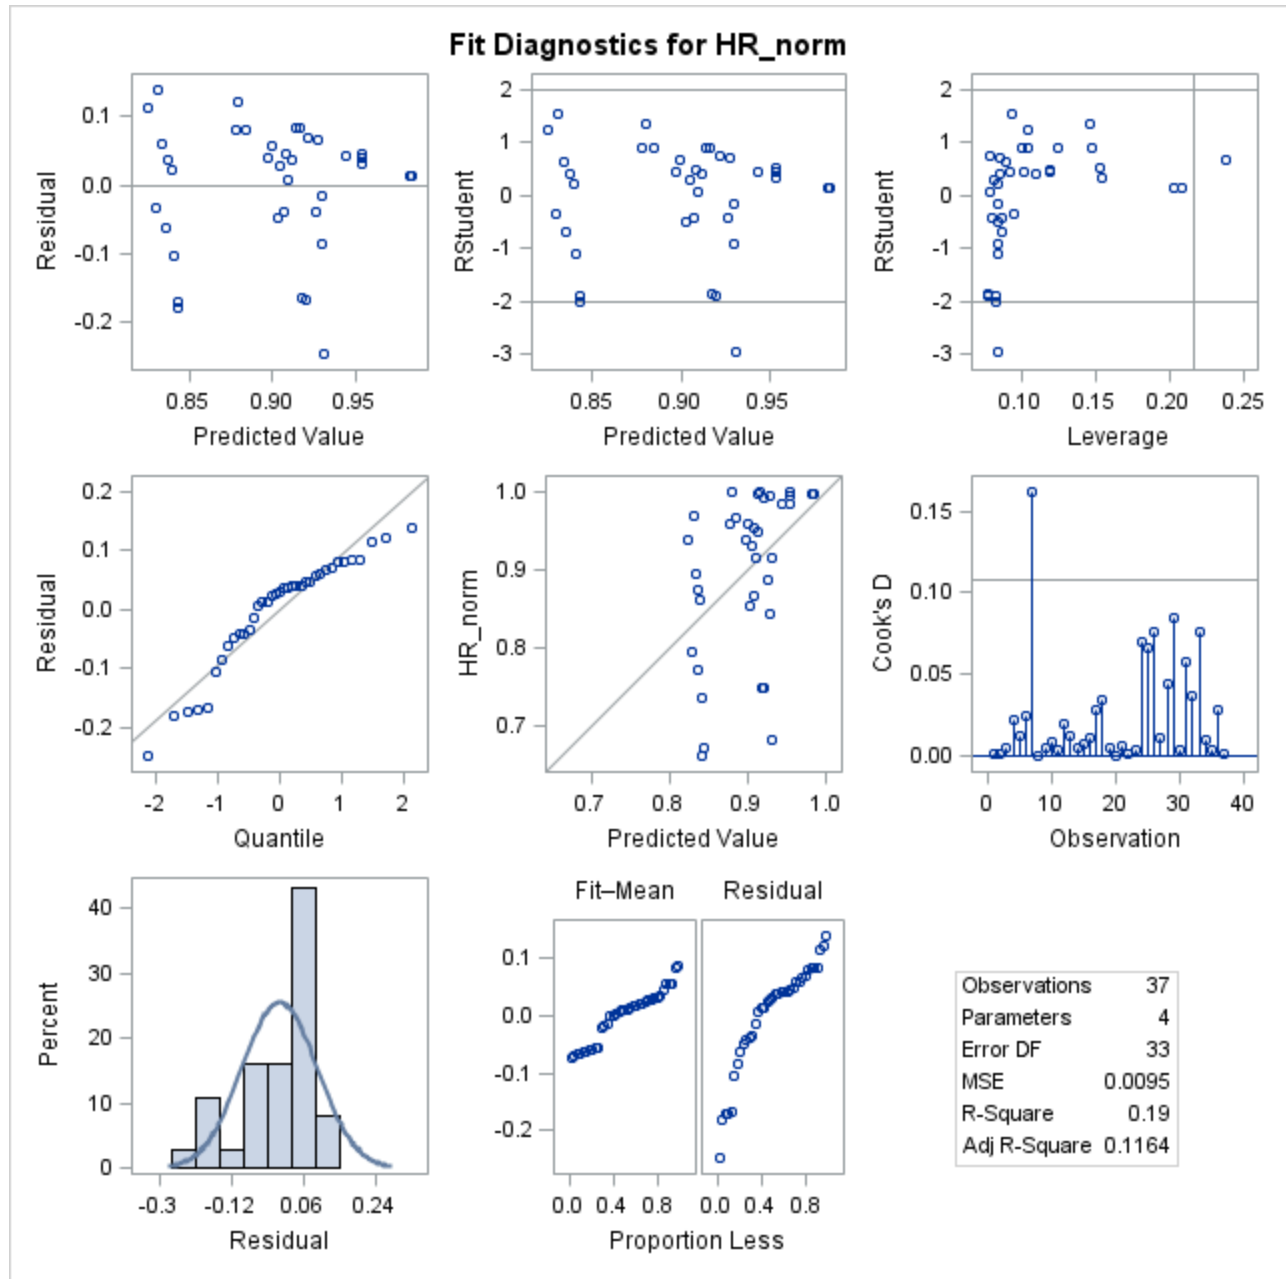

### Residual by Regressors for HR\_norm

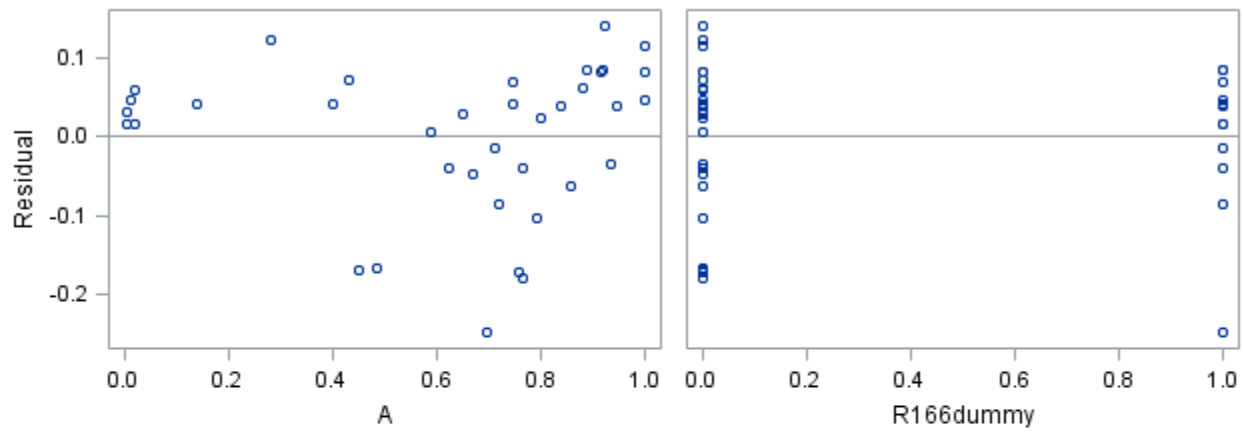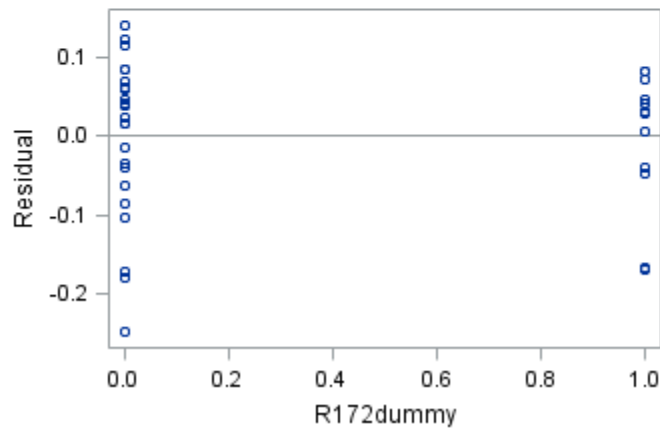

# The SAS System

The REG Procedure  
Model: MODEL1  
Dependent Variable: HR\_norm

|                             |    |
|-----------------------------|----|
| Number of Observations Read | 37 |
| Number of Observations Used | 37 |

| Analysis of Variance |    |                |             |         |        |
|----------------------|----|----------------|-------------|---------|--------|
| Source               | DF | Sum of Squares | Mean Square | F Value | Pr > F |
| Model                | 3  | 0.29007        | 0.09669     | 32.29   | <.0001 |
| Error                | 33 | 0.09881        | 0.00299     |         |        |
| Corrected Total      | 36 | 0.38887        |             |         |        |

|                |         |          |        |
|----------------|---------|----------|--------|
| Root MSE       | 0.05472 | R-Square | 0.7459 |
| Dependent Mean | 0.89848 | Adj R-Sq | 0.7228 |
| Coeff Var      | 6.09011 |          |        |

| Parameter Estimates |    |                    |                |         |         |
|---------------------|----|--------------------|----------------|---------|---------|
| Variable            | DF | Parameter Estimate | Standard Error | t Value | Pr >  t |
| Intercept           | 1  | 0.93421            | 0.01875        | 49.82   | <.0001  |
| B                   | 1  | -0.23462           | 0.02643        | -8.88   | <.0001  |
| R166dummy           | 1  | 0.08944            | 0.02234        | 4.00    | 0.0003  |
| R172dummy           | 1  | 0.06455            | 0.02191        | 2.95    | 0.0059  |



# The SAS System

The REG Procedure  
Model: MODEL1  
Dependent Variable: HR\_norm

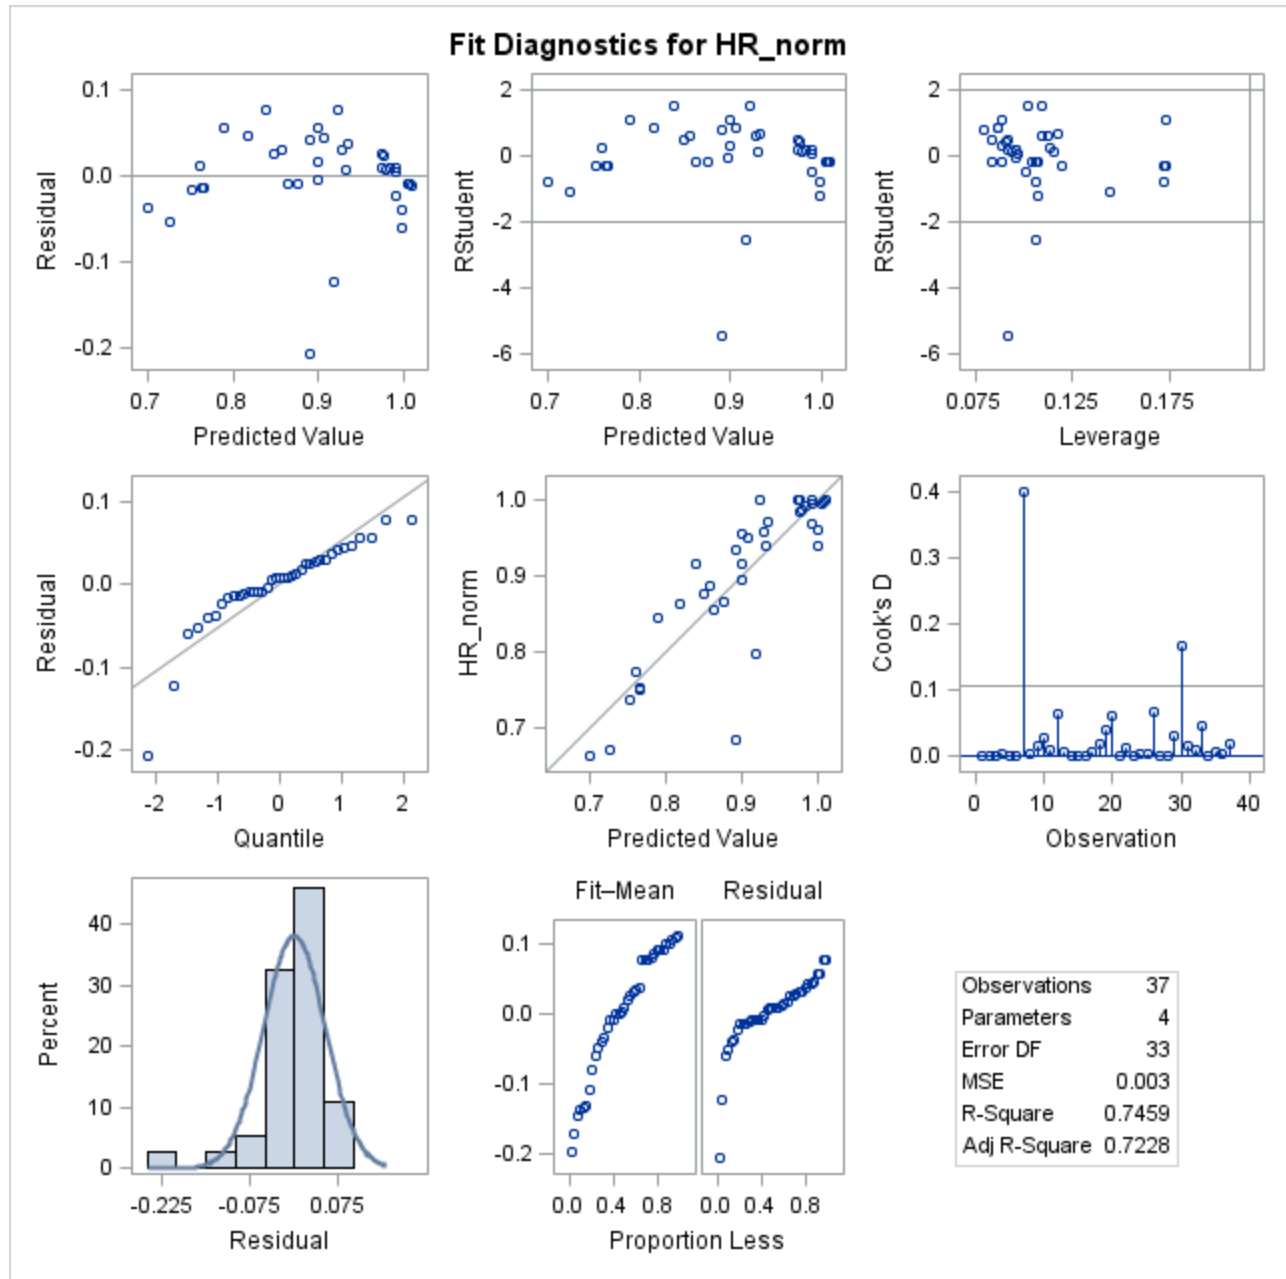

### Residual by Regressors for HR\_norm

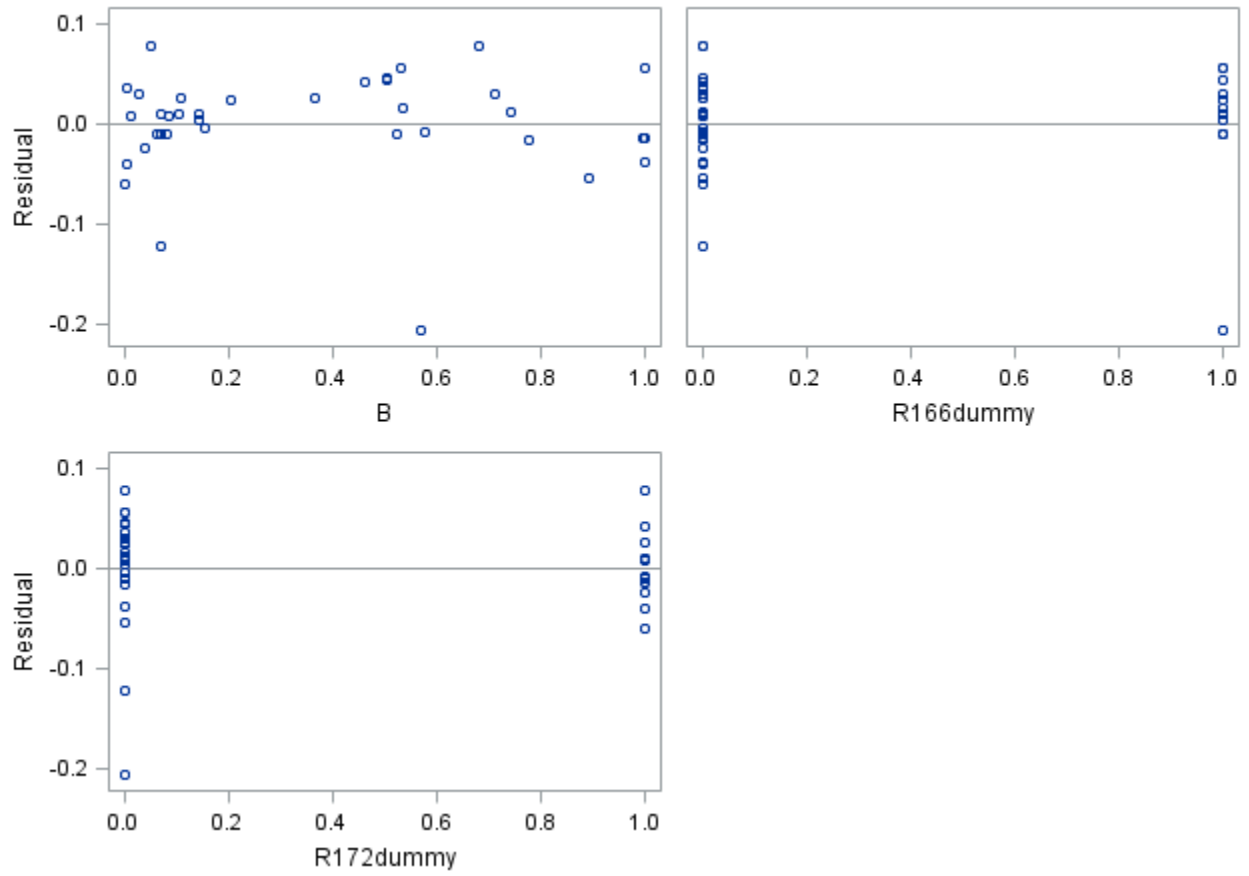

# The SAS System

The REG Procedure  
Model: MODEL1  
Dependent Variable: HR\_norm

|                             |    |
|-----------------------------|----|
| Number of Observations Read | 37 |
| Number of Observations Used | 37 |

| Analysis of Variance |    |                |             |         |        |
|----------------------|----|----------------|-------------|---------|--------|
| Source               | DF | Sum of Squares | Mean Square | F Value | Pr > F |
| Model                | 3  | 0.15790        | 0.05263     | 7.52    | 0.0006 |
| Error                | 33 | 0.23098        | 0.00700     |         |        |
| Corrected Total      | 36 | 0.38887        |             |         |        |

|                |         |          |        |
|----------------|---------|----------|--------|
| Root MSE       | 0.08366 | R-Square | 0.4060 |
| Dependent Mean | 0.89848 | Adj R-Sq | 0.3520 |
| Coeff Var      | 9.31143 |          |        |

| Parameter Estimates |    |                    |                |         |         |
|---------------------|----|--------------------|----------------|---------|---------|
| Variable            | DF | Parameter Estimate | Standard Error | t Value | Pr >  t |
| Intercept           | 1  | 0.98367            | 0.04348        | 22.62   | <.0001  |
| C                   | 1  | -0.17545           | 0.04558        | -3.85   | 0.0005  |
| R166dummy           | 1  | 0.06211            | 0.03493        | 1.78    | 0.0846  |
| R172dummy           | 1  | 0.00921            | 0.03707        | 0.25    | 0.8053  |

# The SAS System

The REG Procedure  
Model: MODEL1  
Dependent Variable: HR\_norm

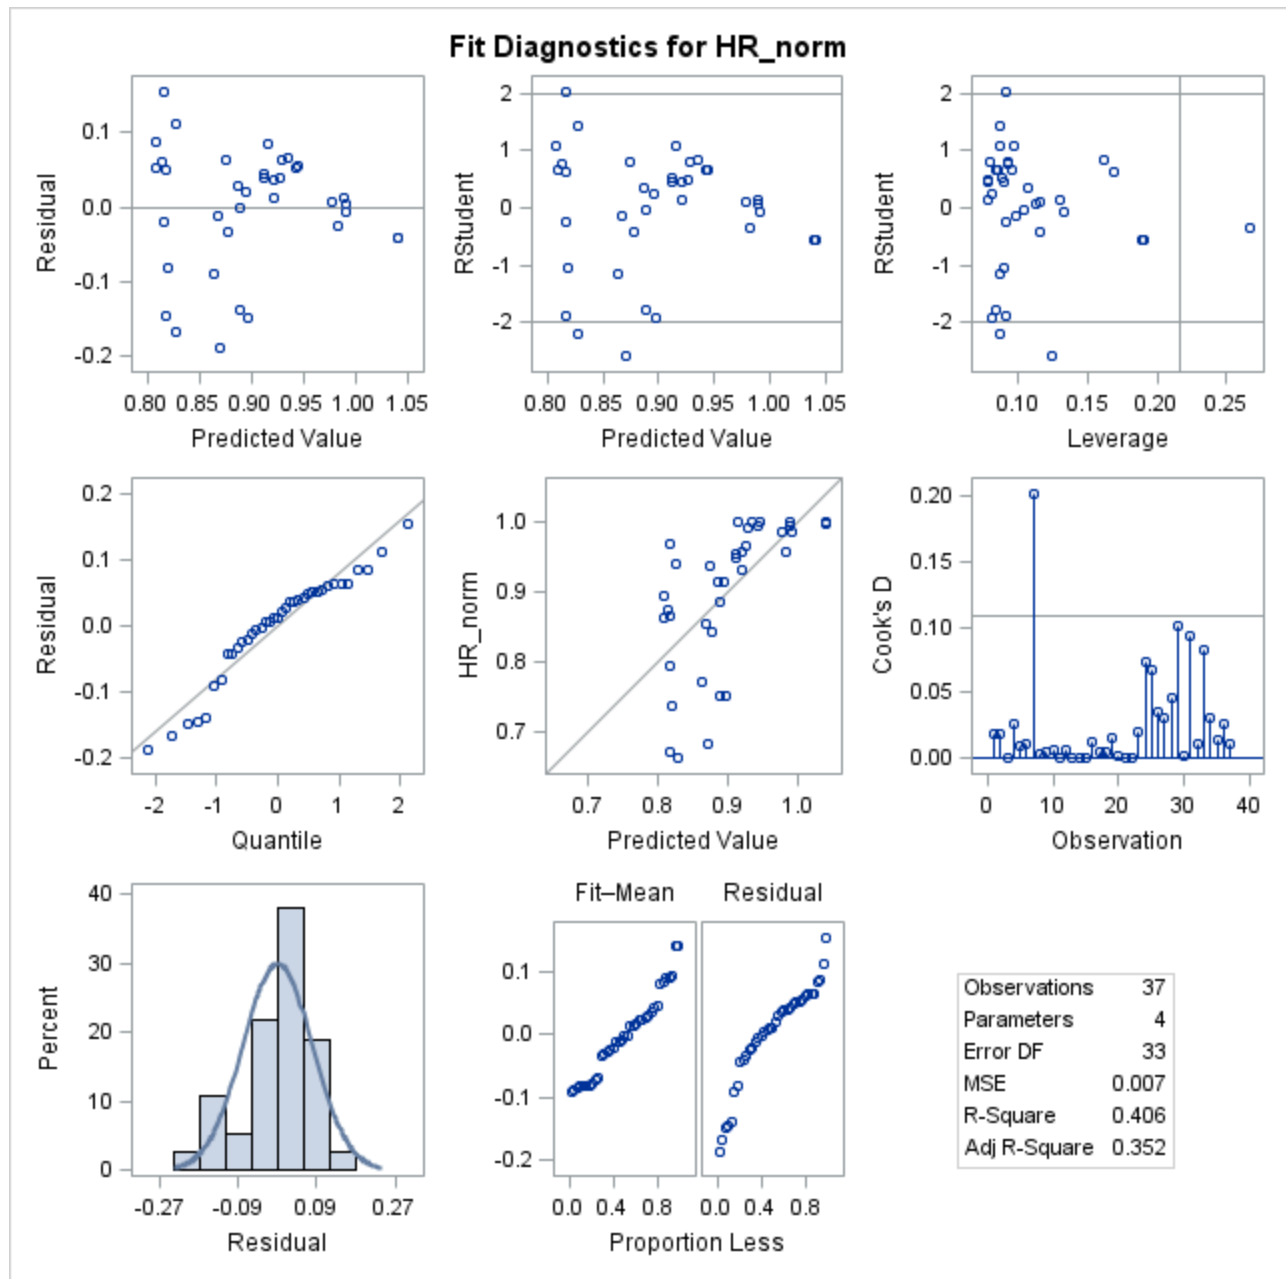

### Residual by Regressors for HR\_norm

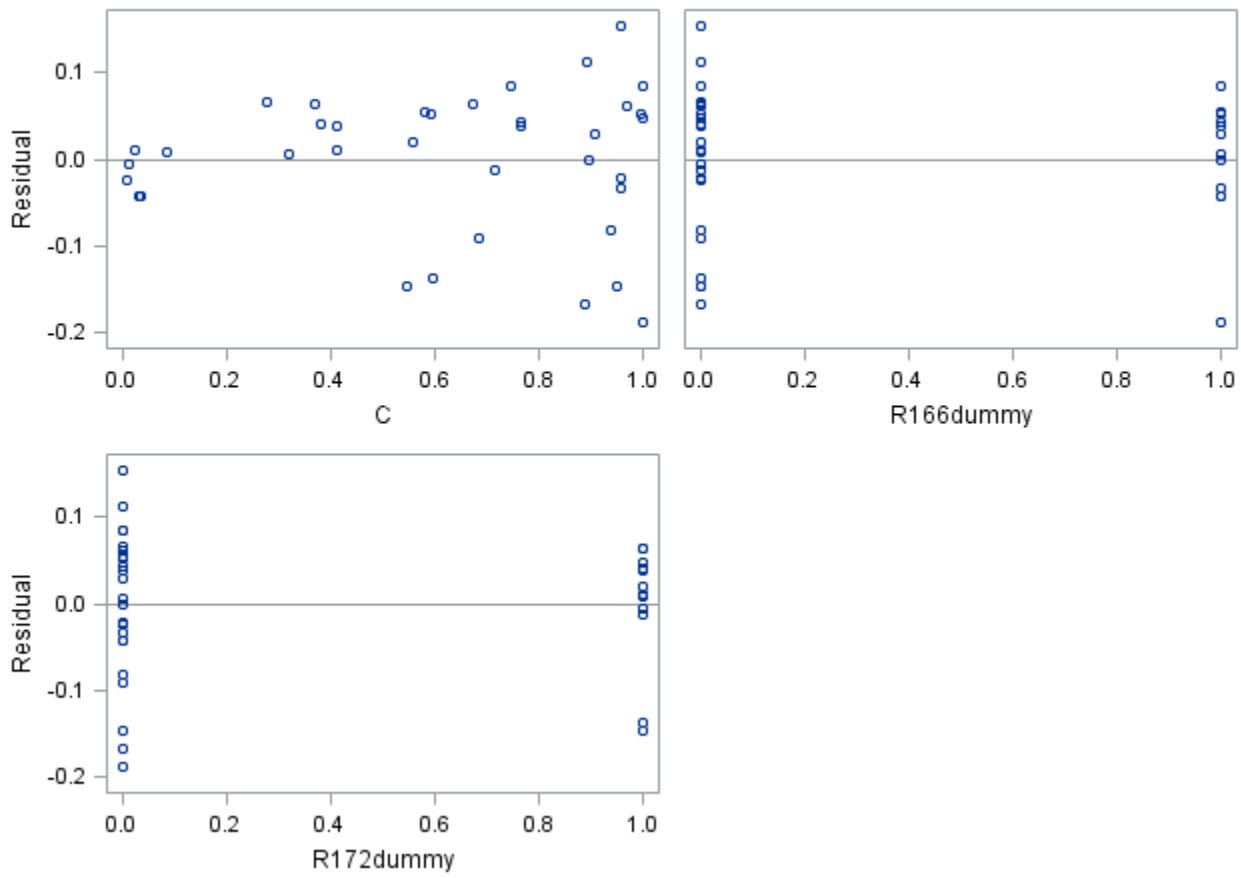

# The SAS System

The REG Procedure  
Model: MODEL1  
Dependent Variable: SV

|                             |    |
|-----------------------------|----|
| Number of Observations Read | 37 |
| Number of Observations Used | 37 |

| Analysis of Variance |    |                |             |         |        |
|----------------------|----|----------------|-------------|---------|--------|
| Source               | DF | Sum of Squares | Mean Square | F Value | Pr > F |
| Model                | 3  | 7408.24373     | 2469.41458  | 30.84   | <.0001 |
| Error                | 33 | 2642.25972     | 80.06848    |         |        |
| Corrected Total      | 36 | 10051          |             |         |        |

|                |           |          |        |
|----------------|-----------|----------|--------|
| Root MSE       | 8.94810   | R-Square | 0.7371 |
| Dependent Mean | 141.10553 | Adj R-Sq | 0.7132 |
| Coeff Var      | 6.34142   |          |        |

| Parameter Estimates |    |                    |                |         |         |
|---------------------|----|--------------------|----------------|---------|---------|
| Variable            | DF | Parameter Estimate | Standard Error | t Value | Pr >  t |
| Intercept           | 1  | 161.18380          | 3.06664        | 52.56   | <.0001  |
| B                   | 1  | -4.30763           | 4.32282        | -1.00   | 0.3263  |
| R166dummy           | 1  | -34.78463          | 3.65307        | -9.52   | <.0001  |
| R172dummy           | 1  | -20.46910          | 3.58372        | -5.71   | <.0001  |

# The SAS System

The REG Procedure  
Model: MODEL1  
Dependent Variable: SV

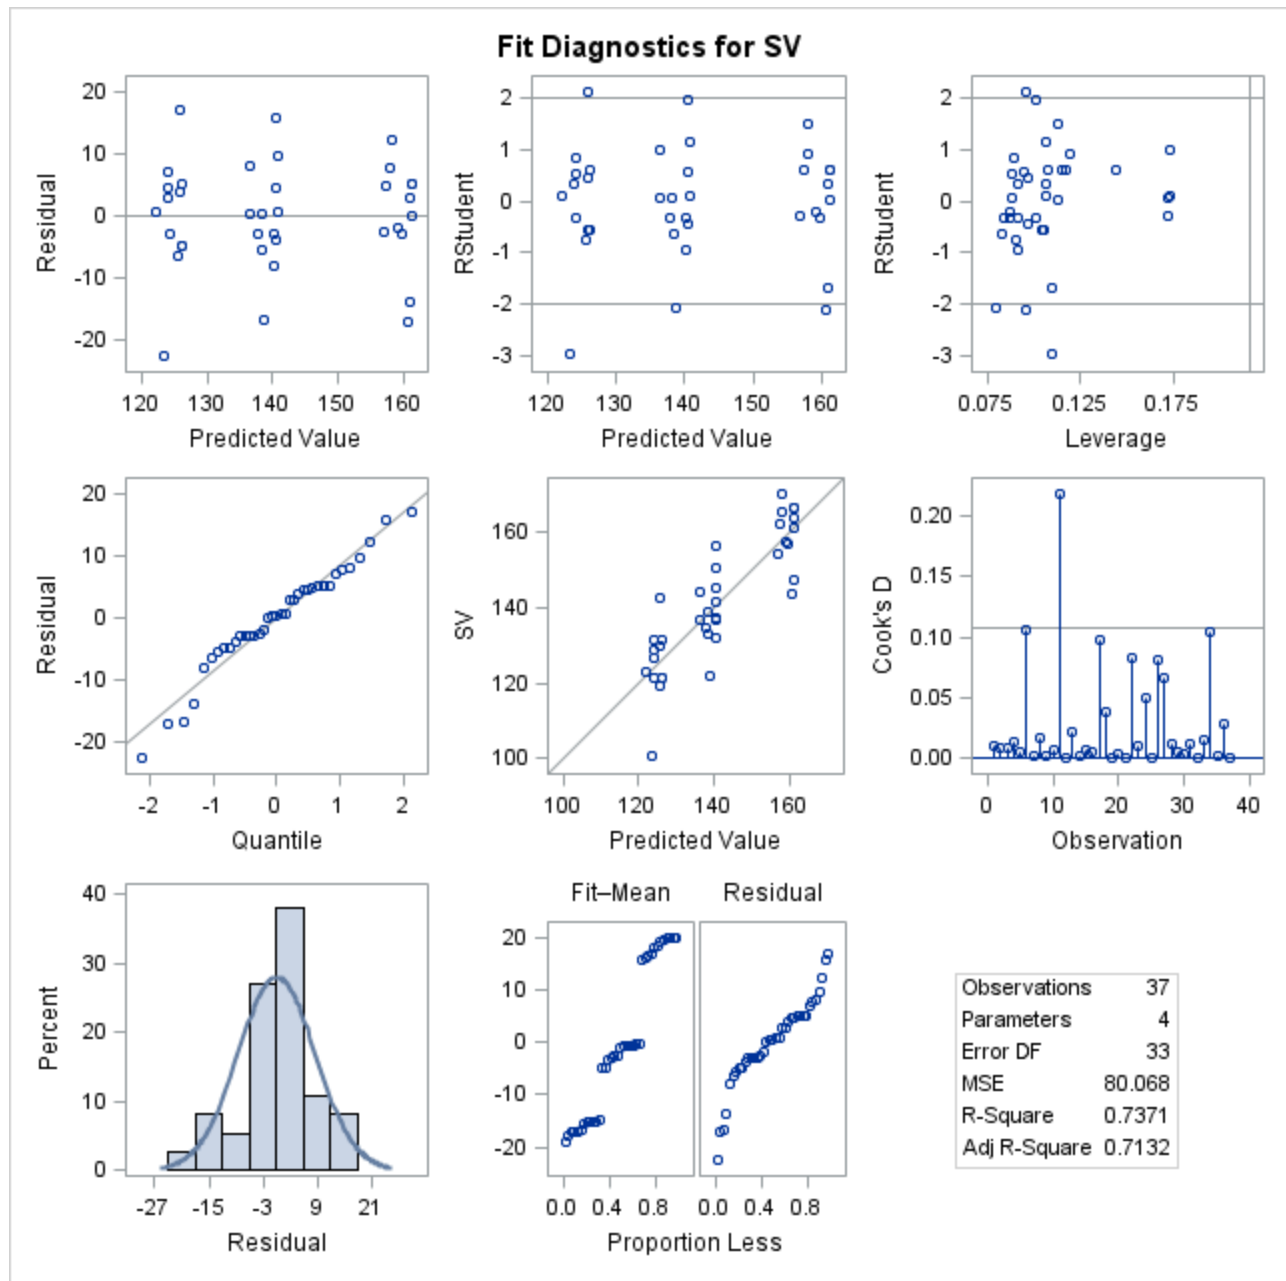

### Residual by Regressors for SV

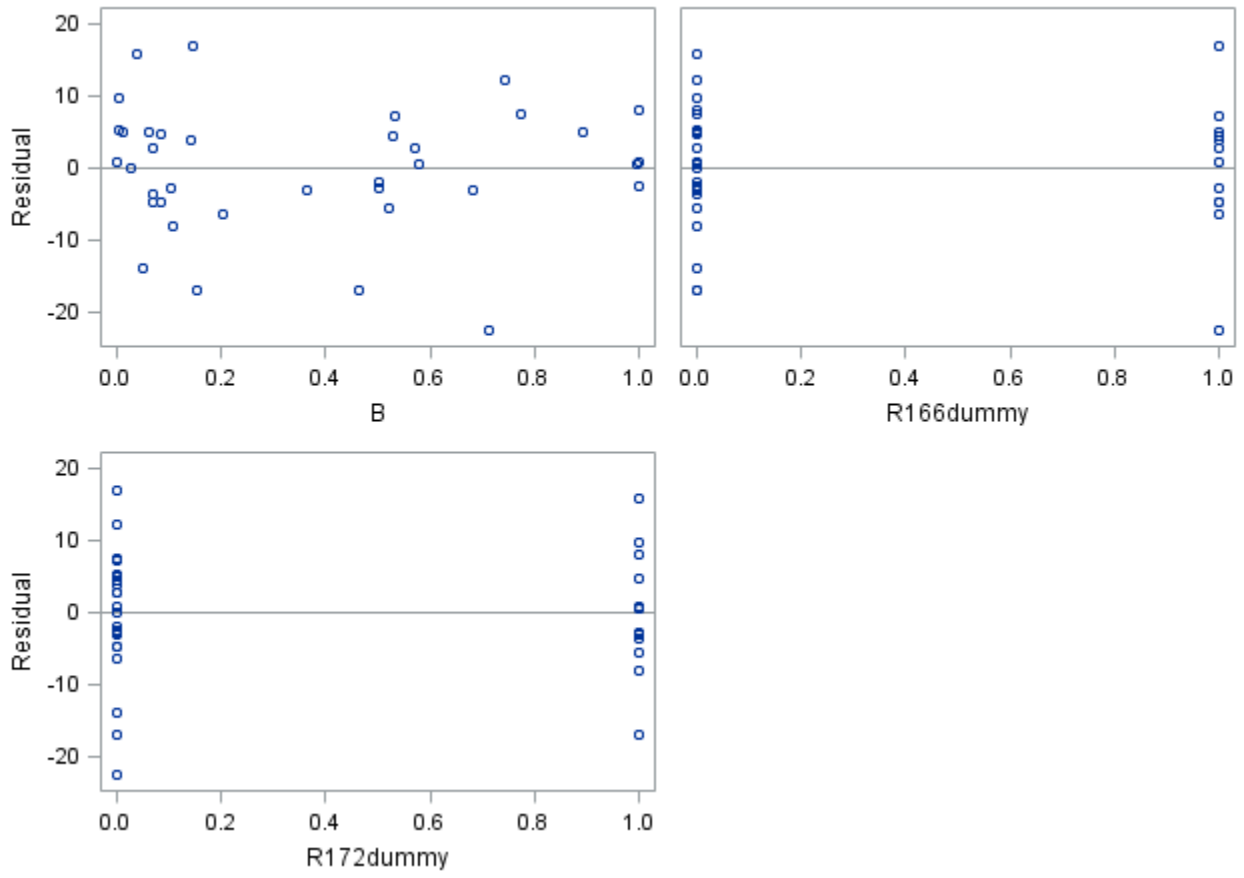



# The SAS System

The REG Procedure  
Model: MODEL1  
Dependent Variable: EF

|                             |    |
|-----------------------------|----|
| Number of Observations Read | 37 |
| Number of Observations Used | 37 |

| Analysis of Variance |    |                |             |         |        |
|----------------------|----|----------------|-------------|---------|--------|
| Source               | DF | Sum of Squares | Mean Square | F Value | Pr > F |
| Model                | 3  | 1647.71635     | 549.23878   | 84.00   | <.0001 |
| Error                | 33 | 215.78445      | 6.53892     |         |        |
| Corrected Total      | 36 | 1863.50079     |             |         |        |

|                |          |          |        |
|----------------|----------|----------|--------|
| Root MSE       | 2.55713  | R-Square | 0.8842 |
| Dependent Mean | 74.84876 | Adj R-Sq | 0.8737 |
| Coeff Var      | 3.41640  |          |        |

| Parameter Estimates |    |                    |                |         |         |
|---------------------|----|--------------------|----------------|---------|---------|
| Variable            | DF | Parameter Estimate | Standard Error | t Value | Pr >  t |
| Intercept           | 1  | 80.29170           | 0.87637        | 91.62   | <.0001  |
| B                   | 1  | -6.50842           | 1.23535        | -5.27   | <.0001  |
| R166dummy           | 1  | -11.93133          | 1.04395        | -11.43  | <.0001  |
| R172dummy           | 1  | 2.42365            | 1.02413        | 2.37    | 0.0240  |

# The SAS System

The REG Procedure  
Model: MODEL1  
Dependent Variable: EF

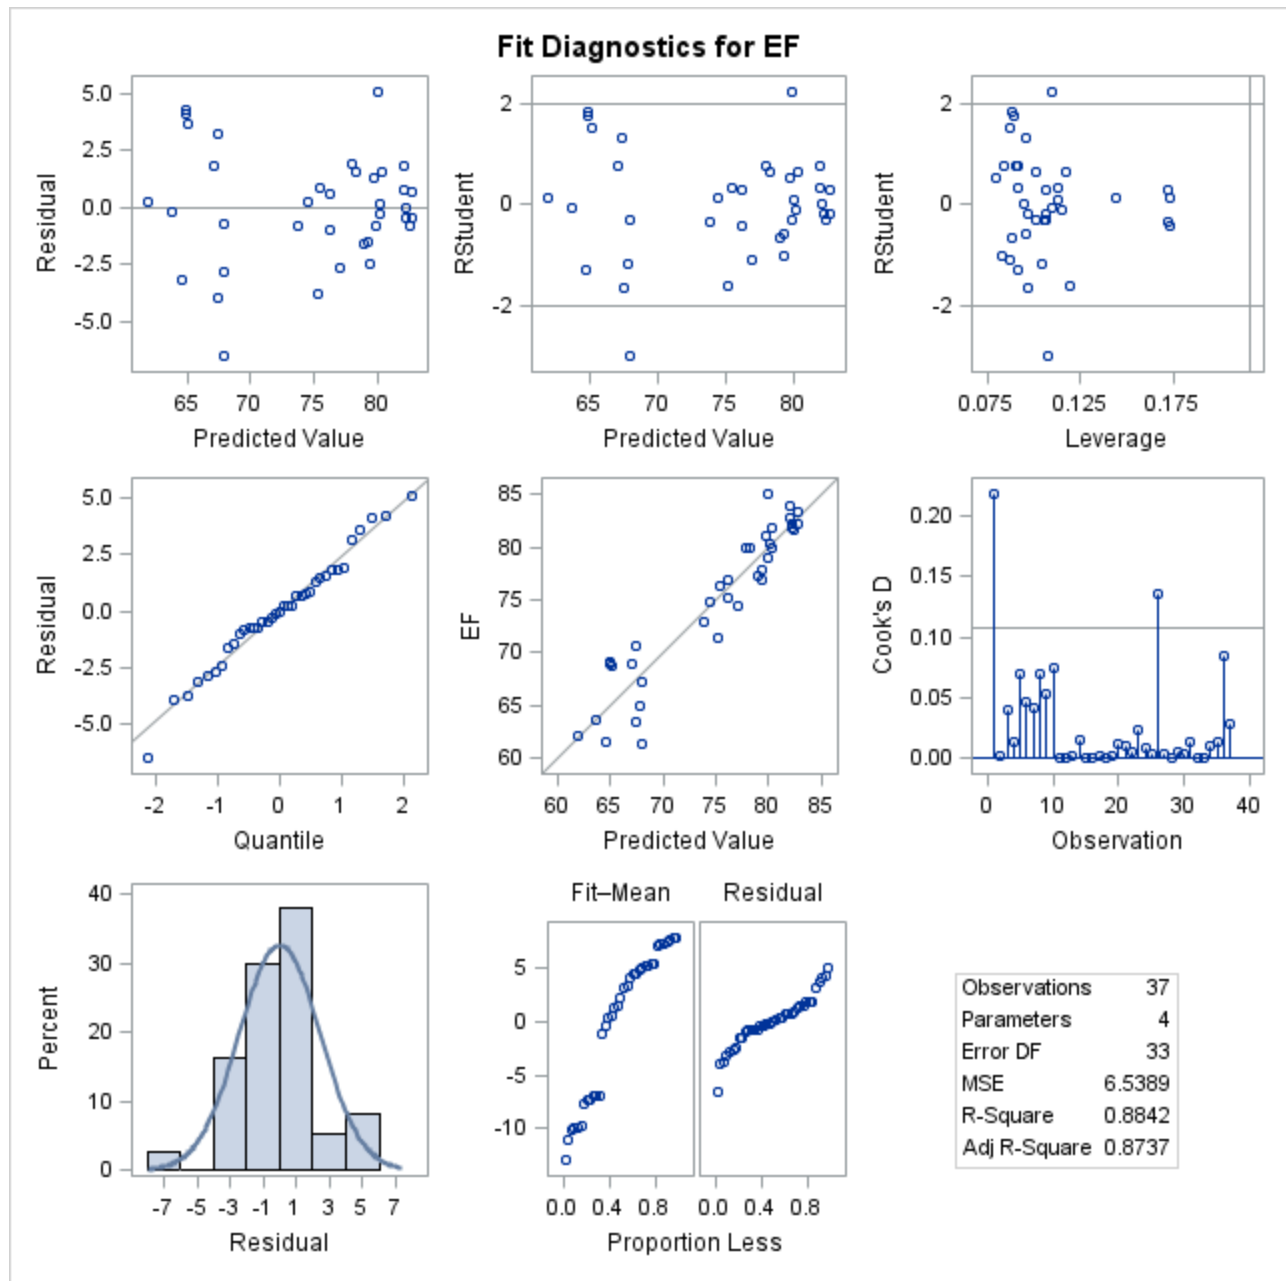

### Residual by Regressors for EF

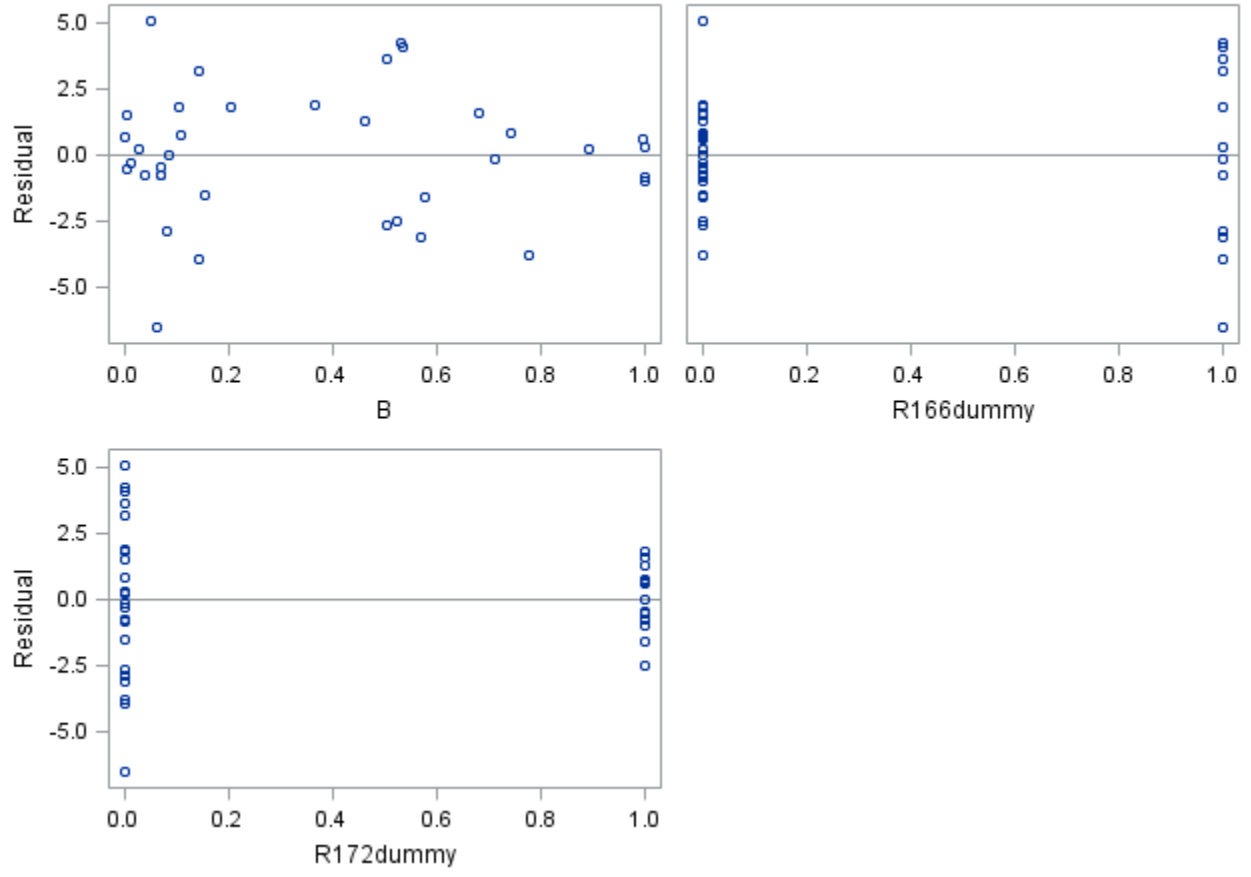

# The SAS System

The REG Procedure  
Model: MODEL1  
Dependent Variable: FS

|                             |    |
|-----------------------------|----|
| Number of Observations Read | 37 |
| Number of Observations Used | 37 |

| Analysis of Variance |    |                |             |         |        |
|----------------------|----|----------------|-------------|---------|--------|
| Source               | DF | Sum of Squares | Mean Square | F Value | Pr > F |
| Model                | 3  | 1291.96054     | 430.65351   | 86.81   | <.0001 |
| Error                | 33 | 163.70562      | 4.96078     |         |        |
| Corrected Total      | 36 | 1455.66616     |             |         |        |

|                |          |          |        |
|----------------|----------|----------|--------|
| Root MSE       | 2.22728  | R-Square | 0.8875 |
| Dependent Mean | 45.03932 | Adj R-Sq | 0.8773 |
| Coeff Var      | 4.94519  |          |        |

| Parameter Estimates |    |                    |                |         |         |
|---------------------|----|--------------------|----------------|---------|---------|
| Variable            | DF | Parameter Estimate | Standard Error | t Value | Pr >  t |
| Intercept           | 1  | 50.02341           | 0.76332        | 65.53   | <.0001  |
| B                   | 1  | -6.33329           | 1.07600        | -5.89   | <.0001  |
| R166dummy           | 1  | -10.40718          | 0.90929        | -11.45  | <.0001  |
| R172dummy           | 1  | 2.13703            | 0.89203        | 2.40    | 0.0224  |

# The SAS System

The REG Procedure  
Model: MODEL1  
Dependent Variable: FS

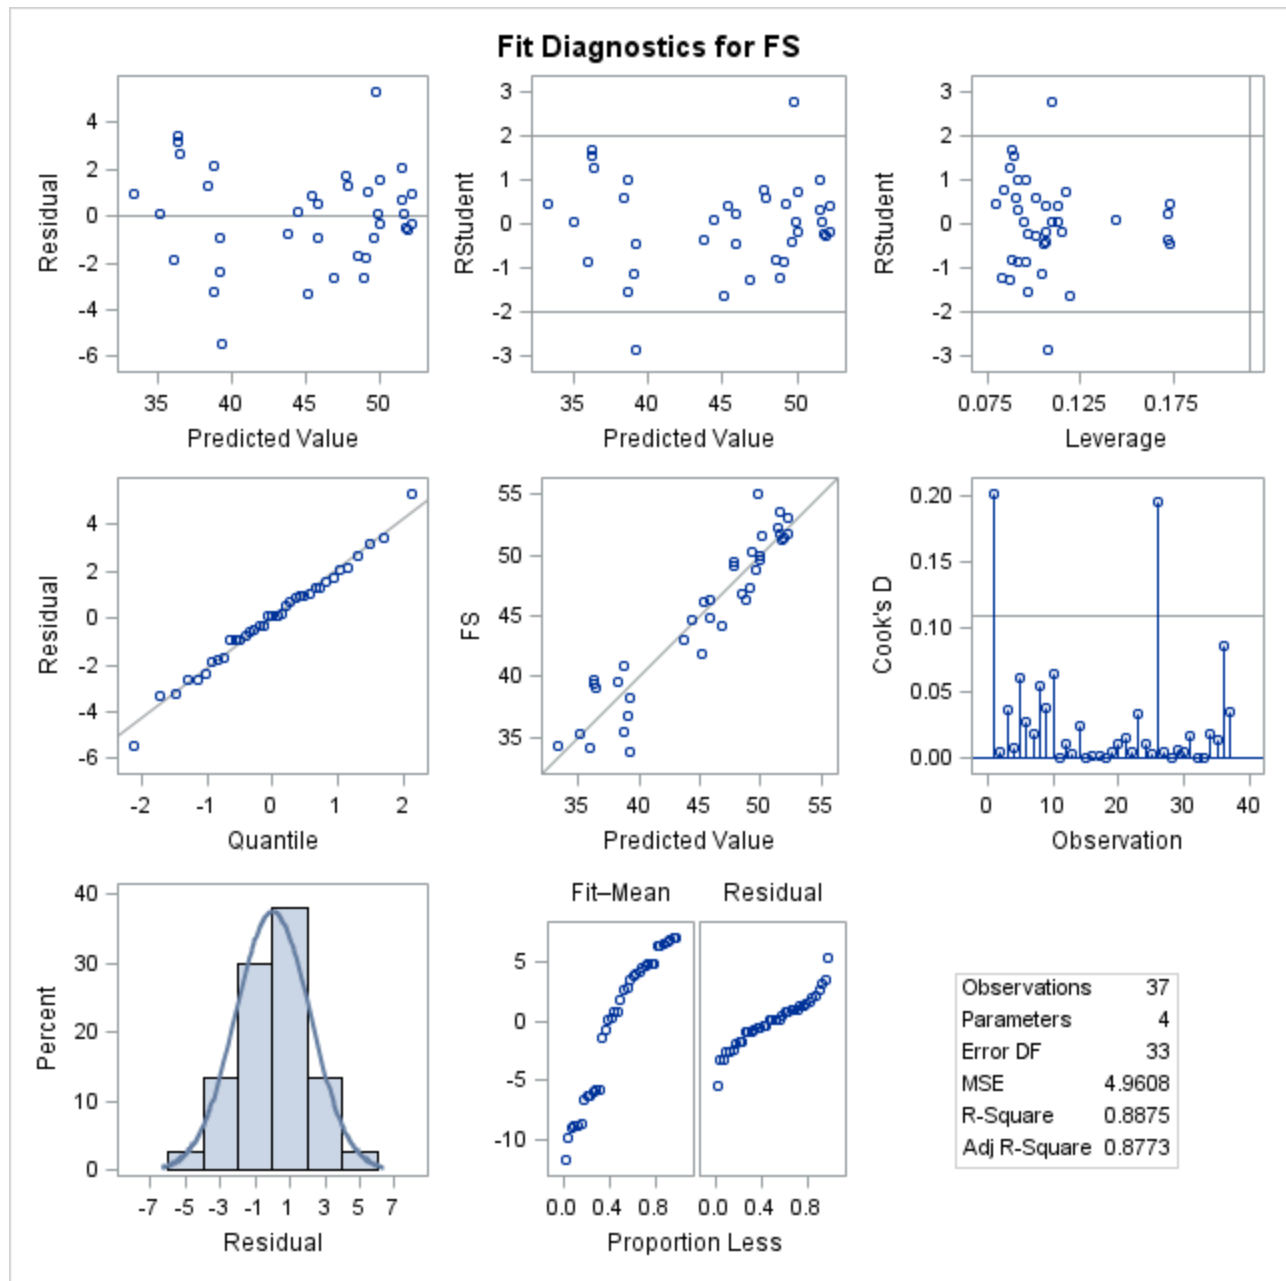

### Residual by Regressors for FS

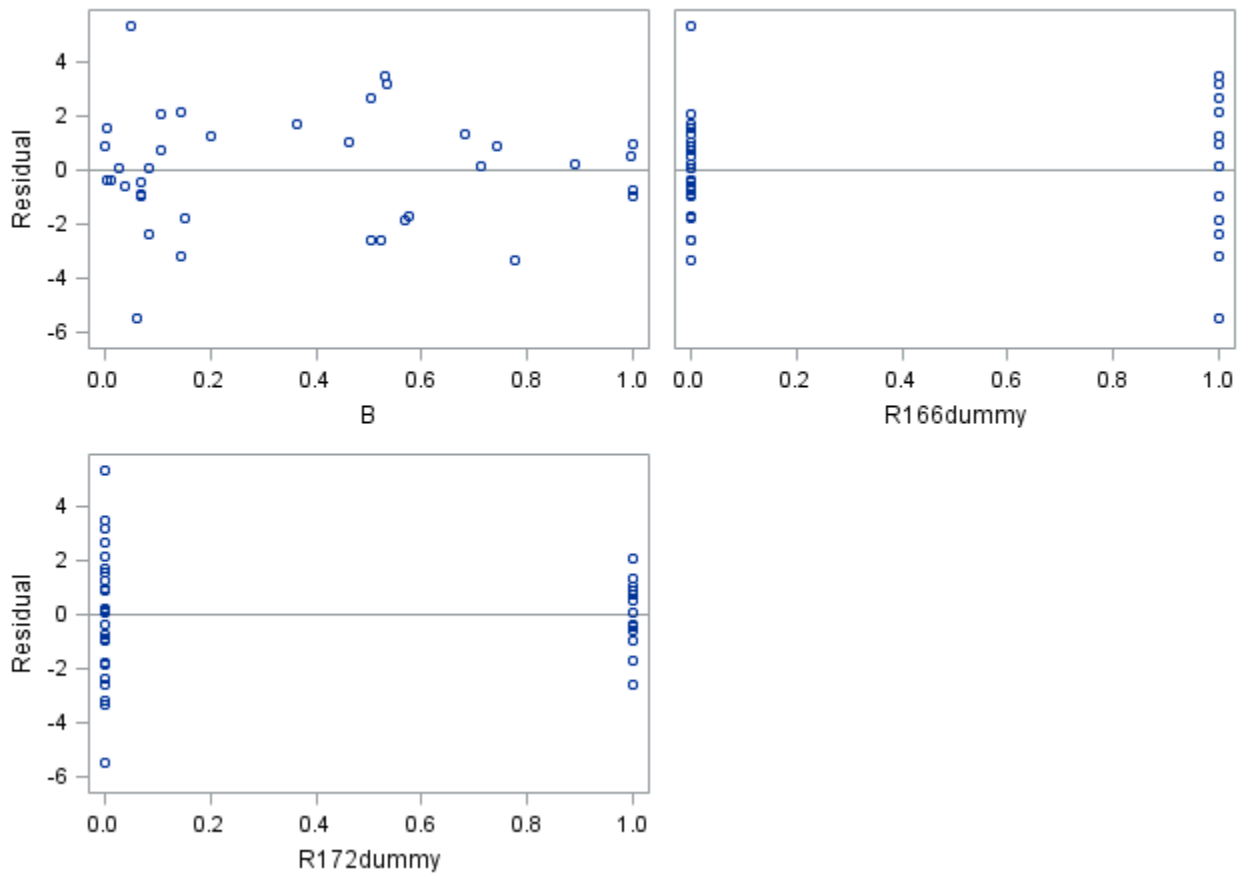

# The SAS System

The REG Procedure  
Model: MODEL1  
Dependent Variable: CO

|                             |    |
|-----------------------------|----|
| Number of Observations Read | 37 |
| Number of Observations Used | 37 |

| Analysis of Variance |    |                |             |         |        |
|----------------------|----|----------------|-------------|---------|--------|
| Source               | DF | Sum of Squares | Mean Square | F Value | Pr > F |
| Model                | 3  | 1314.07639     | 438.02546   | 35.42   | <.0001 |
| Error                | 33 | 408.06249      | 12.36553    |         |        |
| Corrected Total      | 36 | 1722.13888     |             |         |        |

|                |          |          |        |
|----------------|----------|----------|--------|
| Root MSE       | 3.51647  | R-Square | 0.7630 |
| Dependent Mean | 47.02526 | Adj R-Sq | 0.7415 |
| Coeff Var      | 7.47782  |          |        |

| Parameter Estimates |    |                    |                |         |         |
|---------------------|----|--------------------|----------------|---------|---------|
| Variable            | DF | Parameter Estimate | Standard Error | t Value | Pr >  t |
| Intercept           | 1  | 55.14066           | 1.20514        | 45.75   | <.0001  |
| B                   | 1  | -14.25802          | 1.69880        | -8.39   | <.0001  |
| R166dummy           | 1  | -7.69469           | 1.43560        | -5.36   | <.0001  |
| R172dummy           | 1  | -0.87558           | 1.40835        | -0.62   | 0.5384  |

# The SAS System

The REG Procedure  
Model: MODEL1  
Dependent Variable: CO

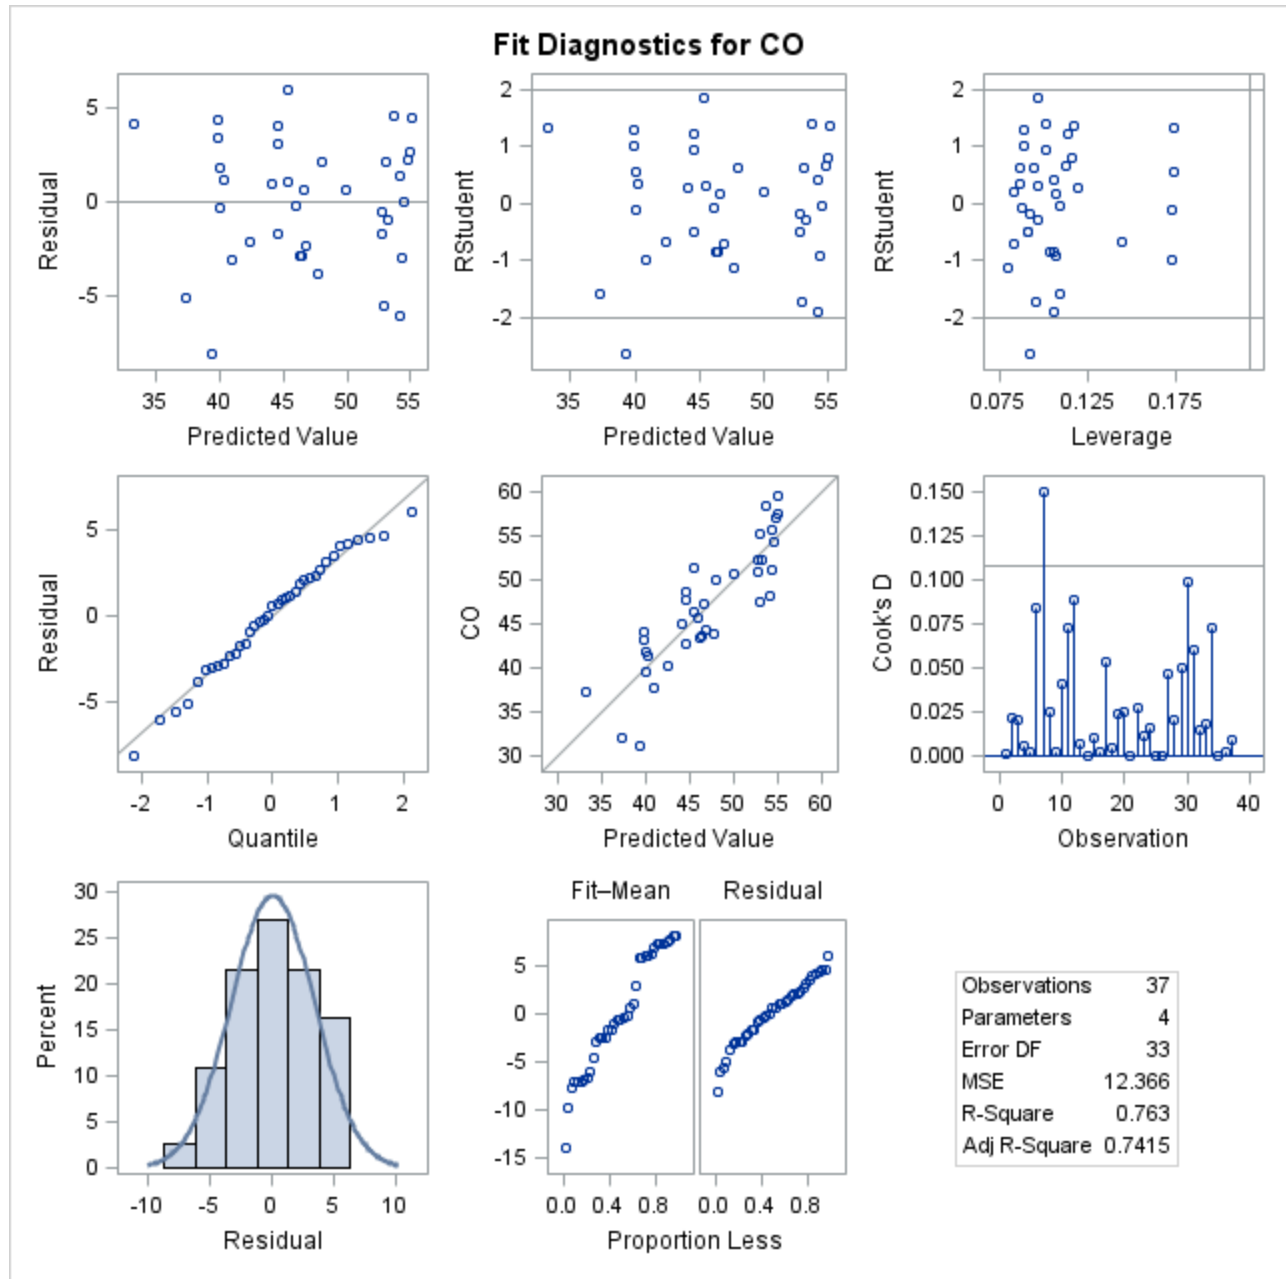



### Residual by Regressors for CO

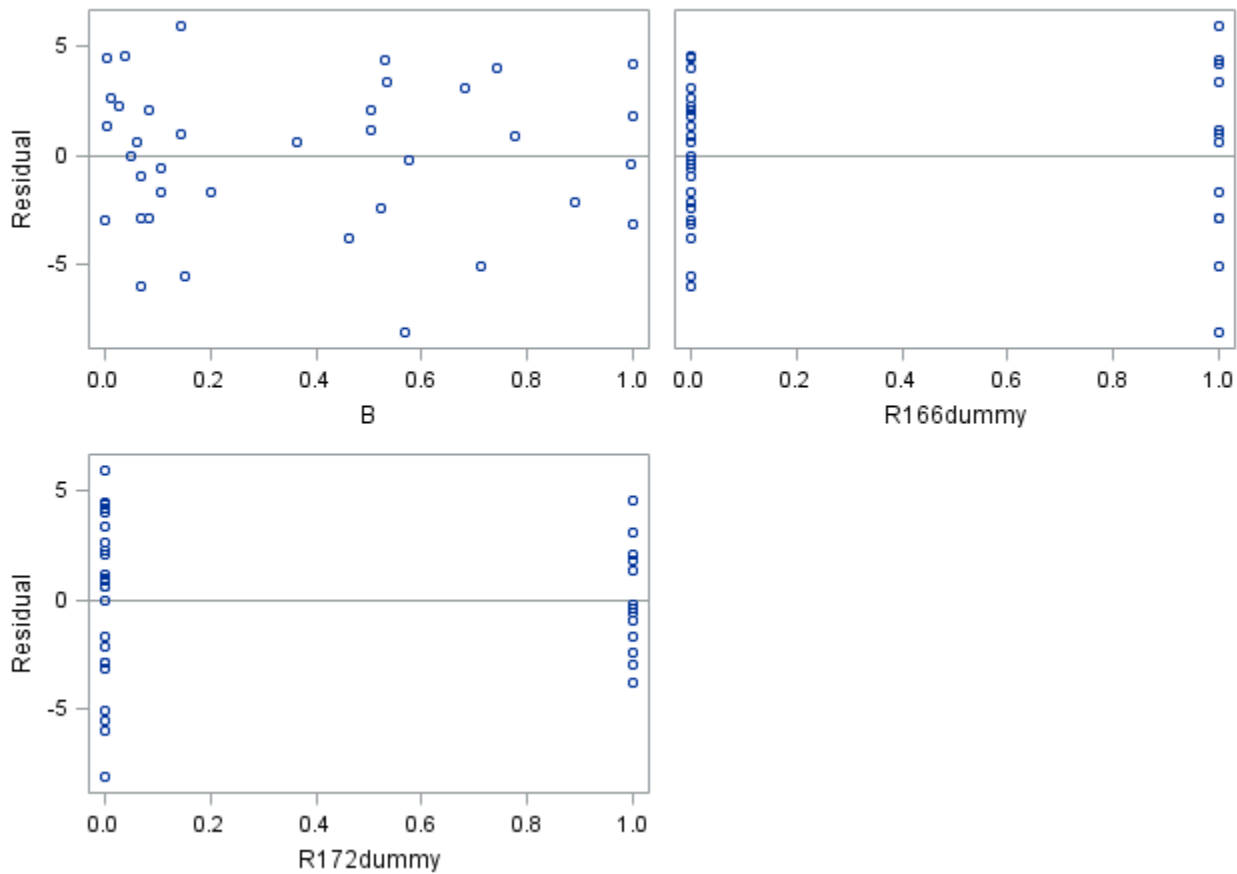

Supplement: 42234_2018_5_MOESM2_ESM.pdf [file 42234_2018_5_MOESM2_ESM.pdf]
