# Supplementary material for: B fibers are the best predictors of cardiac activity during Vagus nerve stimulation: Qing, vagal B fiber activation and cardiac effects
Source: PubMed Central journal article supplement (PMC7098216; doi:10.1186/s42234-018-0005-8), 2018-04-20

## The SAS System

| Obs | Rat  | Q    | A       | B       | C        | HR_norm | R153dummy | R154dummy | R162dummy | R163dummy | R164dummy |
|-----|------|------|---------|---------|----------|---------|-----------|-----------|-----------|-----------|-----------|
| 1   | R153 | 0.0  | 0.03757 | 0.02625 | 0.04517  | 0.96987 | 1         | 0         | 0         | 0         | 0         |
| 2   | R153 | 6.0  | 0.24665 | 0.14945 | 0.27477  | 1.00000 | 1         | 0         | 0         | 0         | 0         |
| 3   | R153 | 9.0  | 0.29311 | 0.19160 | 0.37670  | 0.94332 | 1         | 0         | 0         | 0         | 0         |
| 4   | R153 | 12.0 | 0.51534 | 0.46254 | 0.35317  | 0.88481 | 1         | 0         | 0         | 0         | 0         |
| 5   | R153 | 15.0 | 0.43986 | 0.29355 | 0.47341  | 0.85460 | 1         | 0         | 0         | 0         | 0         |
| 6   | R153 | 18.0 | 0.69452 | 0.88736 | 0.09346  | 0.79223 | 1         | 0         | 0         | 0         | 0         |
| 7   | R153 | 24.0 | 0.75878 | 0.92298 | 0.13004  | 0.71566 | 1         | 0         | 0         | 0         | 0         |
| 8   | R153 | 0.0  | 0.05334 | 0.03142 | 0.04193  | 0.99655 | 1         | 0         | 0         | 0         | 0         |
| 9   | R153 | 6.0  | 0.29398 | 0.09271 | 0.21370  | 0.99012 | 1         | 0         | 0         | 0         | 0         |
| 10  | R153 | 9.0  | 0.54440 | 0.35610 | 0.21963  | 0.93384 | 1         | 0         | 0         | 0         | 0         |
| 11  | R153 | 12.0 | 0.28928 | 0.12121 | 0.38004  | 0.95727 | 1         | 0         | 0         | 0         | 0         |
| 12  | R153 | 15.0 | 0.41323 | 0.47393 | 0.11855  | 0.92732 | 1         | 0         | 0         | 0         | 0         |
| 13  | R153 | 18.0 | 0.24988 | 0.33718 | 0.42039  | 0.84855 | 1         | 0         | 0         | 0         | 0         |
| 14  | R153 | 24.0 | 0.40475 | 0.67549 | 0.31320  | 0.73576 | 1         | 0         | 0         | 0         | 0         |
| 15  | R153 | 30.0 | 0.48592 | 0.50000 | 0.52773  | 0.83669 | 1         | 0         | 0         | 0         | 0         |
| 16  | R153 | 36.0 | 0.59371 | 0.71943 | 0.33304  | 0.73576 | 1         | 0         | 0         | 0         | 0         |
| 17  | R153 | 0.0  | 0.05298 | 0.01714 | 0.05618  | 0.97062 | 1         | 0         | 0         | 0         | 0         |
| 18  | R153 | 6.0  | 0.53903 | 0.17313 | 0.04400  | 0.96245 | 1         | 0         | 0         | 0         | 0         |
| 19  | R153 | 9.0  | 0.35994 | 0.25283 | 0.17583  | 0.96054 | 1         | 0         | 0         | 0         | 0         |
| 20  | R153 | 12.0 | 0.33631 | 0.19393 | 0.44242  | 0.95304 | 1         | 0         | 0         | 0         | 0         |
| 21  | R153 | 15.0 | 0.23098 | 0.11701 | 0.42540  | 0.97125 | 1         | 0         | 0         | 0         | 0         |
| 22  | R153 | 18.0 | 0.46822 | 0.43880 | 0.37414  | 0.82185 | 1         | 0         | 0         | 0         | 0         |
| 23  | R153 | 24.0 | 0.27254 | 0.13504 | 0.73672  | 0.90871 | 1         | 0         | 0         | 0         | 0         |
| 24  | R153 | 30.0 | 0.39736 | 0.33347 | 0.61020  | 0.75452 | 1         | 0         | 0         | 0         | 0         |
| 25  | R153 | 0.0  | 0.06224 | 0.05580 | 0.01992  | 0.99203 | 1         | 0         | 0         | 0         | 0         |
| 26  | R153 | 6.0  | 0.20649 | 0.16780 | 0.08171  | 0.98088 | 1         | 0         | 0         | 0         | 0         |
| 27  | R153 | 9.0  | 0.37261 | 0.31729 | 0.11804  | 0.97094 | 1         | 0         | 0         | 0         | 0         |
| 28  | R153 | 12.0 | 0.33209 | 0.17494 | 0.26786  | 0.95544 | 1         | 0         | 0         | 0         | 0         |
| 29  | R153 | 15.0 | 0.14273 | 0.16856 | 0.44608  | 0.97021 | 1         | 0         | 0         | 0         | 0         |
| 30  | R153 | 18.0 | 0.11983 | 0.09746 | 0.46421  | 0.97818 | 1         | 0         | 0         | 0         | 0         |
| 31  | R153 | 24.0 | 0.18858 | 0.15246 | 0.59000  | 0.96781 | 1         | 0         | 0         | 0         | 0         |
| 32  | R153 | 30.0 | 0.58206 | 1.00000 | -0.00240 | 0.79237 | 1         | 0         | 0         | 0         | 0         |
| 33  | R153 | 36.0 | 0.58305 | 0.68897 | 0.36093  | 0.77419 | 1         | 0         | 0         | 0         | 0         |
| 34  | R153 | 0.0  | 0.04014 | 0.01665 | 0.00606  | 0.95294 | 1         | 0         | 0         | 0         | 0         |
| 35  | R153 | 6.0  | 0.28222 | 0.05432 | 0.14078  | 0.96540 | 1         | 0         | 0         | 0         | 0         |
| 36  | R153 | 12.0 | 0.29567 | 0.11185 | 0.32917  | 0.93421 | 1         | 0         | 0         | 0         | 0         |
| 37  | R153 | 18.0 | 0.26022 | 0.12755 | 0.68608  | 0.91831 | 1         | 0         | 0         | 0         | 0         |
| 38  | R153 | 24.0 | 1.00000 | 0.50322 | 0.46372  | 0.82809 | 1         | 0         | 0         | 0         | 0         |
| 39  | R153 | 0.0  | 0.03750 | 0.03276 | 0.04681  | 0.97895 | 1         | 0         | 0         | 0         | 0         |
| 40  | R153 | 6.0  | 0.28592 | 0.04086 | 0.03174  | 0.95372 | 1         | 0         | 0         | 0         | 0         |
| 41  | R153 | 15.0 | 0.28180 | 0.20075 | 0.34458  | 0.91139 | 1         | 0         | 0         | 0         | 0         |
| 42  | R153 | 18.0 | 0.31729 | 0.10658 | 0.54132  | 0.91350 | 1         | 0         | 0         | 0         | 0         |
| 43  | R153 | 24.0 | 0.23385 | 0.19933 | 0.71136  | 0.88540 | 1         | 0         | 0         | 0         | 0         |
| 44  | R153 | 30.0 | 0.14187 | 0.21418 | 1.00000  | 0.88006 | 1         | 0         | 0         | 0         | 0         |













|            |      |      |         |         |         |         |   |   |   |   |   |
|------------|------|------|---------|---------|---------|---------|---|---|---|---|---|
|            | R165 | 12.8 | 0.79224 | 0.54543 | 0.63159 | 0.90068 | 0 | 0 | 0 | 0 | 0 |
| <b>322</b> | R165 | 12.8 | 0.73558 | 0.53968 | 0.63810 | 0.92755 | 0 | 0 | 0 | 0 | 0 |
| <b>323</b> | R165 | 8.0  | 0.50374 | 0.29988 | 0.22017 | 0.94998 | 0 | 0 | 0 | 0 | 0 |
| <b>324</b> | R165 | 8.0  | 0.40899 | 0.27034 | 0.09287 | 0.94619 | 0 | 0 | 0 | 0 | 0 |
| <b>325</b> | R165 | 3.2  | 0.01286 | 0.03160 | 0.07768 | 0.94225 | 0 | 0 | 0 | 0 | 0 |
| <b>326</b> | R165 | 4.8  | 0.02167 | 0.03670 | 0.02802 | 0.95268 | 0 | 0 | 0 | 0 | 0 |
| <b>327</b> | R165 | 19.2 | 0.86617 | 0.48594 | 0.65368 | 0.92310 | 0 | 0 | 0 | 0 | 0 |
| <b>328</b> | R165 | 0.0  | 0.02367 | 0.02426 | 0.03407 | 0.97921 | 0 | 0 | 0 | 0 | 0 |
| <b>329</b> | R165 | 16.0 | 0.08714 | 0.04632 | 0.00397 | 0.98901 | 0 | 0 | 0 | 0 | 0 |
| <b>330</b> | R165 | 19.2 | 0.43925 | 0.27103 | 0.47545 | 0.97414 | 0 | 0 | 0 | 0 | 0 |
| <b>331</b> | R165 | 19.2 | 0.47082 | 0.36409 | 0.72798 | 0.96554 | 0 | 0 | 0 | 0 | 0 |
| <b>332</b> | R165 | 4.8  | 0.01326 | 0.03730 | 0.03593 | 0.98784 | 0 | 0 | 0 | 0 | 0 |
| <b>333</b> | R165 | 0.0  | 0.01402 | 0.01786 | 0.04777 | 0.99662 | 0 | 0 | 0 | 0 | 0 |
| <b>334</b> | R165 | 12.8 | 0.27082 | 0.13617 | 0.10365 | 0.99050 | 0 | 0 | 0 | 0 | 0 |



# The SAS System

The REG Procedure  
Model: MODEL1  
Dependent Variable: HR\_norm

|                             |     |
|-----------------------------|-----|
| Number of Observations Read | 334 |
| Number of Observations Used | 334 |

| Analysis of Variance |     |                |             |         |        |
|----------------------|-----|----------------|-------------|---------|--------|
| Source               | DF  | Sum of Squares | Mean Square | F Value | Pr > F |
| Model                | 6   | 1.16269        | 0.19378     | 49.22   | <.0001 |
| Error                | 327 | 1.28743        | 0.00394     |         |        |
| Corrected Total      | 333 | 2.45012        |             |         |        |

|                |         |          |        |
|----------------|---------|----------|--------|
| Root MSE       | 0.06275 | R-Square | 0.4745 |
| Dependent Mean | 0.90845 | Adj R-Sq | 0.4649 |
| Coeff Var      | 6.90694 |          |        |

| Parameter Estimates |    |                    |                |         |         |
|---------------------|----|--------------------|----------------|---------|---------|
| Variable            | DF | Parameter Estimate | Standard Error | t Value | Pr >  t |
| Intercept           | 1  | 0.96171            | 0.00803        | 119.71  | <.0001  |
| Q                   | 1  | -0.00297           | 0.00022221     | -13.35  | <.0001  |
| R153dummy           | 1  | -0.00502           | 0.01138        | -0.44   | 0.6594  |
| R154dummy           | 1  | 0.04803            | 0.01266        | 3.79    | 0.0002  |
| R162dummy           | 1  | -0.06712           | 0.01223        | -5.49   | <.0001  |
| R163dummy           | 1  | 0.03394            | 0.01186        | 2.86    | 0.0045  |
| R164dummy           | 1  | 0.00870            | 0.01126        | 0.77    | 0.4403  |

# The SAS System

The REG Procedure  
Model: MODEL1  
Dependent Variable: HR\_norm

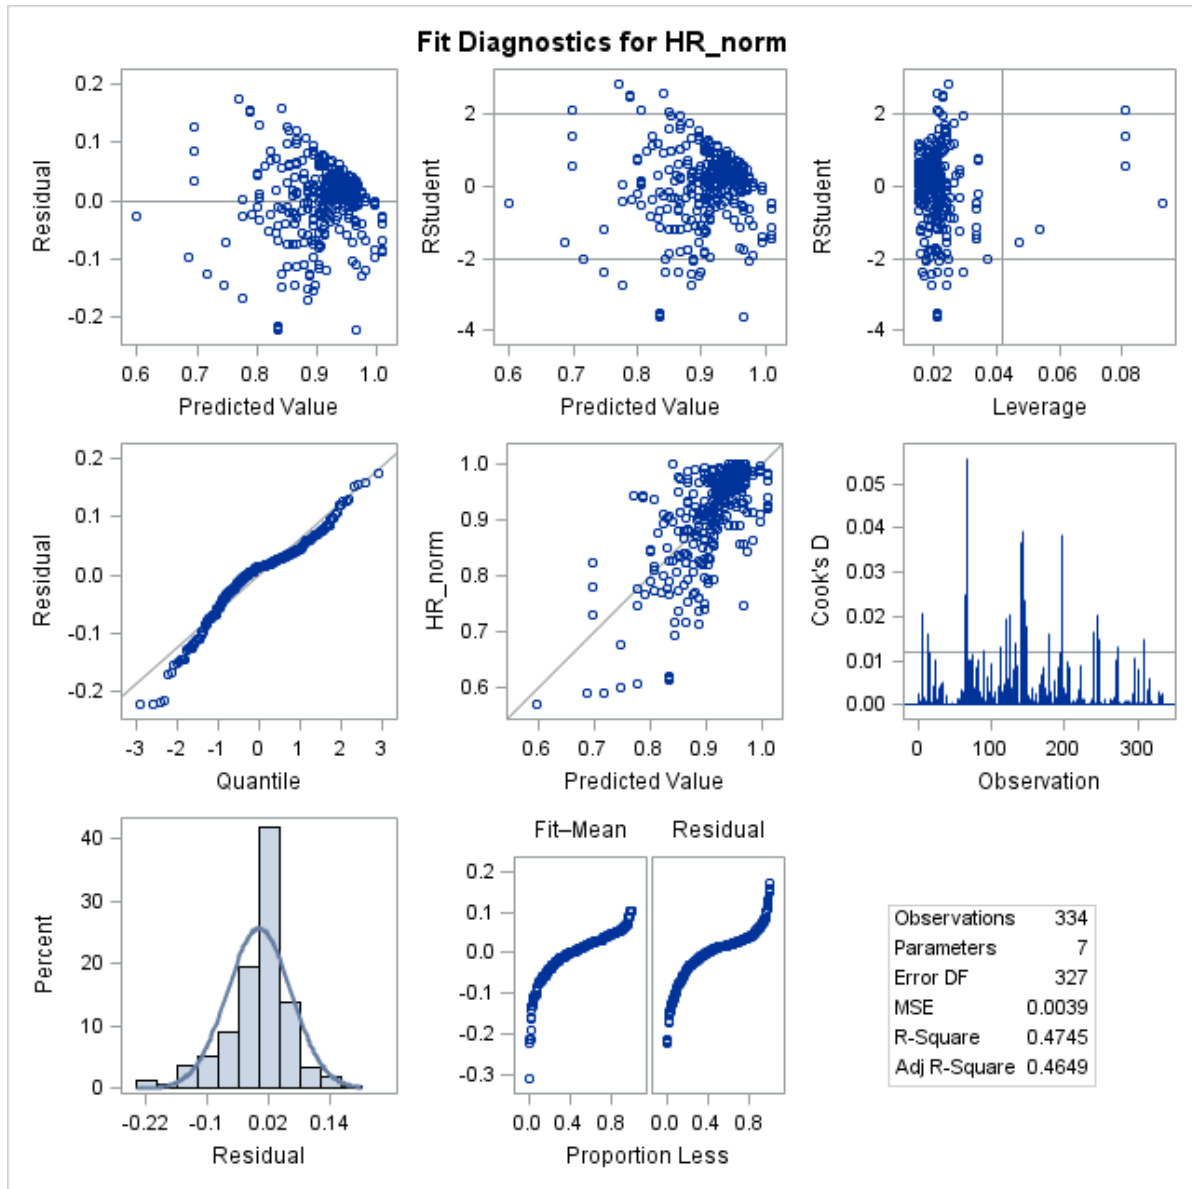

### Residual by Regressors for HR\_norm

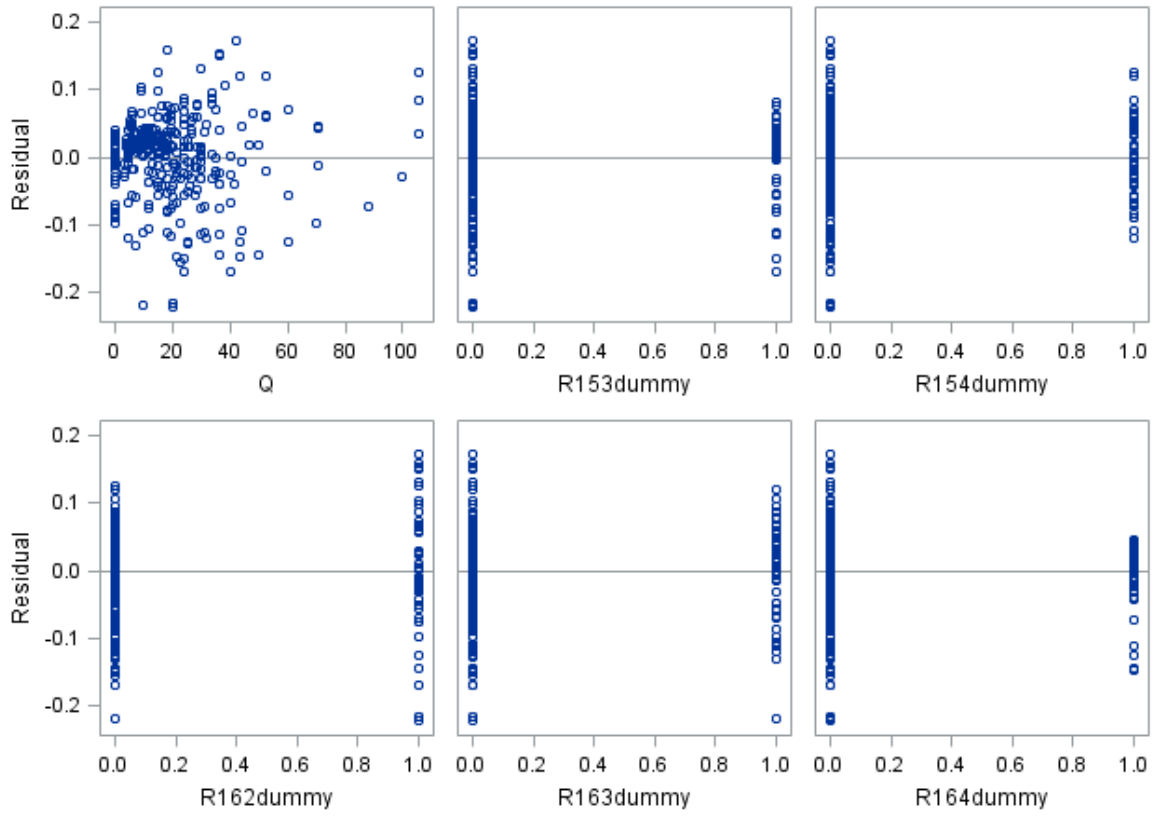

# The SAS System

The REG Procedure  
Model: MODEL1  
Dependent Variable: HR\_norm

|                             |     |
|-----------------------------|-----|
| Number of Observations Read | 334 |
| Number of Observations Used | 334 |

| Analysis of Variance |     |                |             |         |        |
|----------------------|-----|----------------|-------------|---------|--------|
| Source               | DF  | Sum of Squares | Mean Square | F Value | Pr > F |
| Model                | 6   | 0.61351        | 0.10225     | 18.21   | <.0001 |
| Error                | 327 | 1.83661        | 0.00562     |         |        |
| Corrected Total      | 333 | 2.45012        |             |         |        |

|                |         |          |        |
|----------------|---------|----------|--------|
| Root MSE       | 0.07494 | R-Square | 0.2504 |
| Dependent Mean | 0.90845 | Adj R-Sq | 0.2366 |
| Coeff Var      | 8.24958 |          |        |

| Parameter Estimates |    |                    |                |         |         |
|---------------------|----|--------------------|----------------|---------|---------|
| Variable            | DF | Parameter Estimate | Standard Error | t Value | Pr >  t |
| Intercept           | 1  | 0.96288            | 0.01116        | 86.26   | <.0001  |
| A                   | 1  | -0.08328           | 0.01599        | -5.21   | <.0001  |
| R153dummy           | 1  | -0.02289           | 0.01366        | -1.68   | 0.0948  |
| R154dummy           | 1  | -0.02814           | 0.01374        | -2.05   | 0.0413  |
| R162dummy           | 1  | -0.12147           | 0.01445        | -8.40   | <.0001  |
| R163dummy           | 1  | 0.02530            | 0.01417        | 1.79    | 0.0751  |
| R164dummy           | 1  | -0.00273           | 0.01344        | -0.20   | 0.8392  |

# The SAS System

The REG Procedure  
Model: MODEL1  
Dependent Variable: HR\_norm

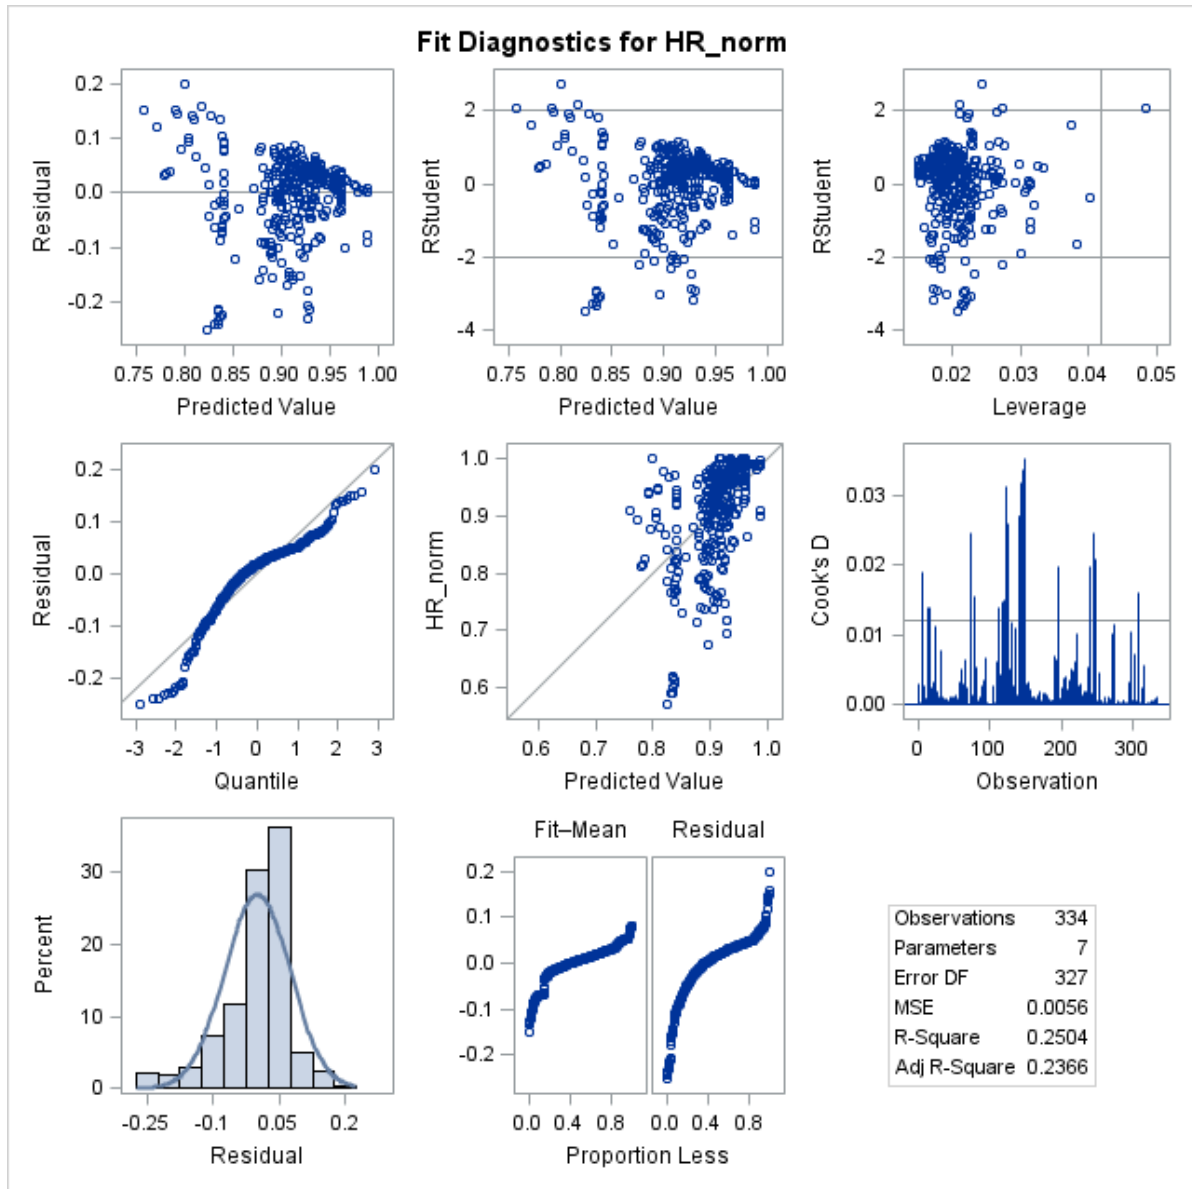

### Residual by Regressors for HR\_norm

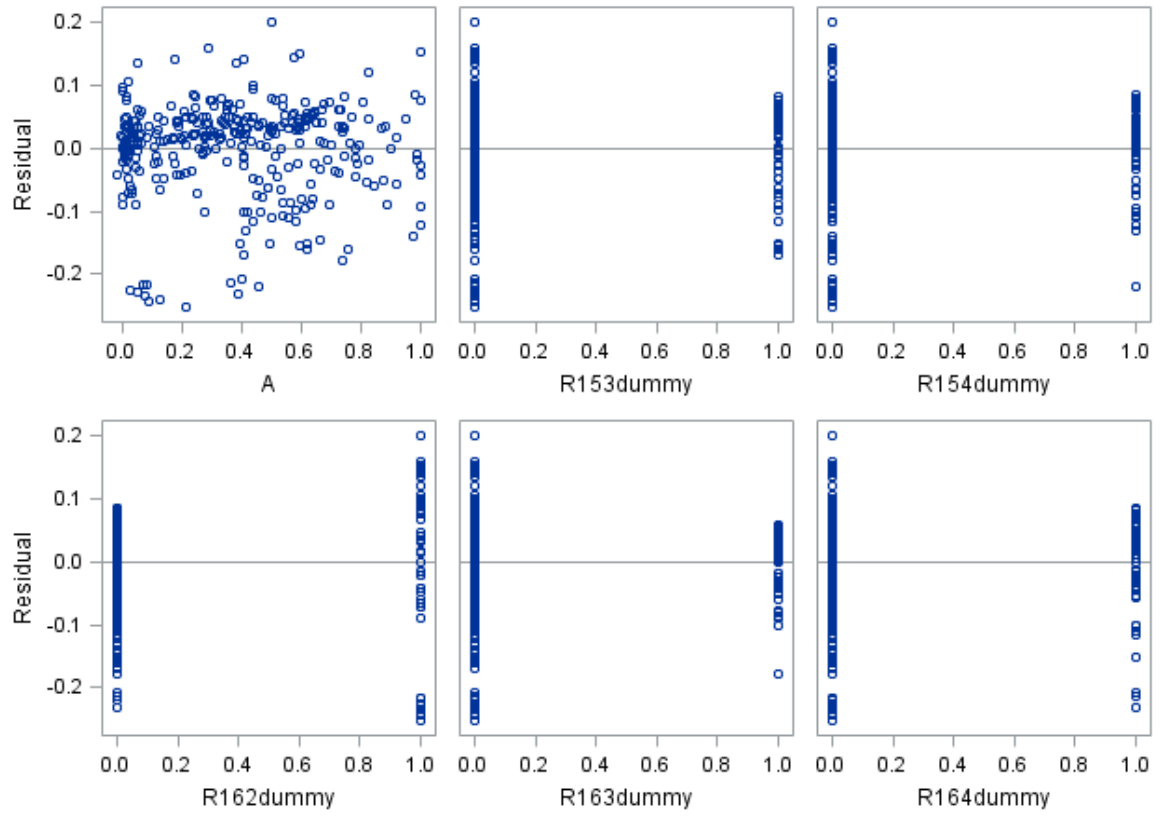

# The SAS System

The REG Procedure  
Model: MODEL1  
Dependent Variable: HR\_norm

|                             |     |
|-----------------------------|-----|
| Number of Observations Read | 334 |
| Number of Observations Used | 334 |

| Analysis of Variance |     |                |             |         |        |
|----------------------|-----|----------------|-------------|---------|--------|
| Source               | DF  | Sum of Squares | Mean Square | F Value | Pr > F |
| Model                | 6   | 1.43366        | 0.23894     | 76.87   | <.0001 |
| Error                | 327 | 1.01646        | 0.00311     |         |        |
| Corrected Total      | 333 | 2.45012        |             |         |        |

|                |         |          |        |
|----------------|---------|----------|--------|
| Root MSE       | 0.05575 | R-Square | 0.5851 |
| Dependent Mean | 0.90845 | Adj R-Sq | 0.5775 |
| Coeff Var      | 6.13718 |          |        |

| Parameter Estimates |    |                    |                |         |         |
|---------------------|----|--------------------|----------------|---------|---------|
| Variable            | DF | Parameter Estimate | Standard Error | t Value | Pr >  t |
| Intercept           | 1  | 0.99033            | 0.00763        | 129.84  | <.0001  |
| B                   | 1  | -0.19671           | 0.01112        | -17.69  | <.0001  |
| R153dummy           | 1  | -0.02851           | 0.01012        | -2.82   | 0.0052  |
| R154dummy           | 1  | -0.00841           | 0.01023        | -0.82   | 0.4118  |
| R162dummy           | 1  | -0.07761           | 0.01067        | -7.27   | <.0001  |
| R163dummy           | 1  | 0.00724            | 0.01050        | 0.69    | 0.4905  |
| R164dummy           | 1  | 0.00583            | 0.00996        | 0.59    | 0.5589  |

# The SAS System

## The REG Procedure

Model: MODEL1

Dependent Variable: HR\_norm

### Fit Diagnostics for HR\_norm

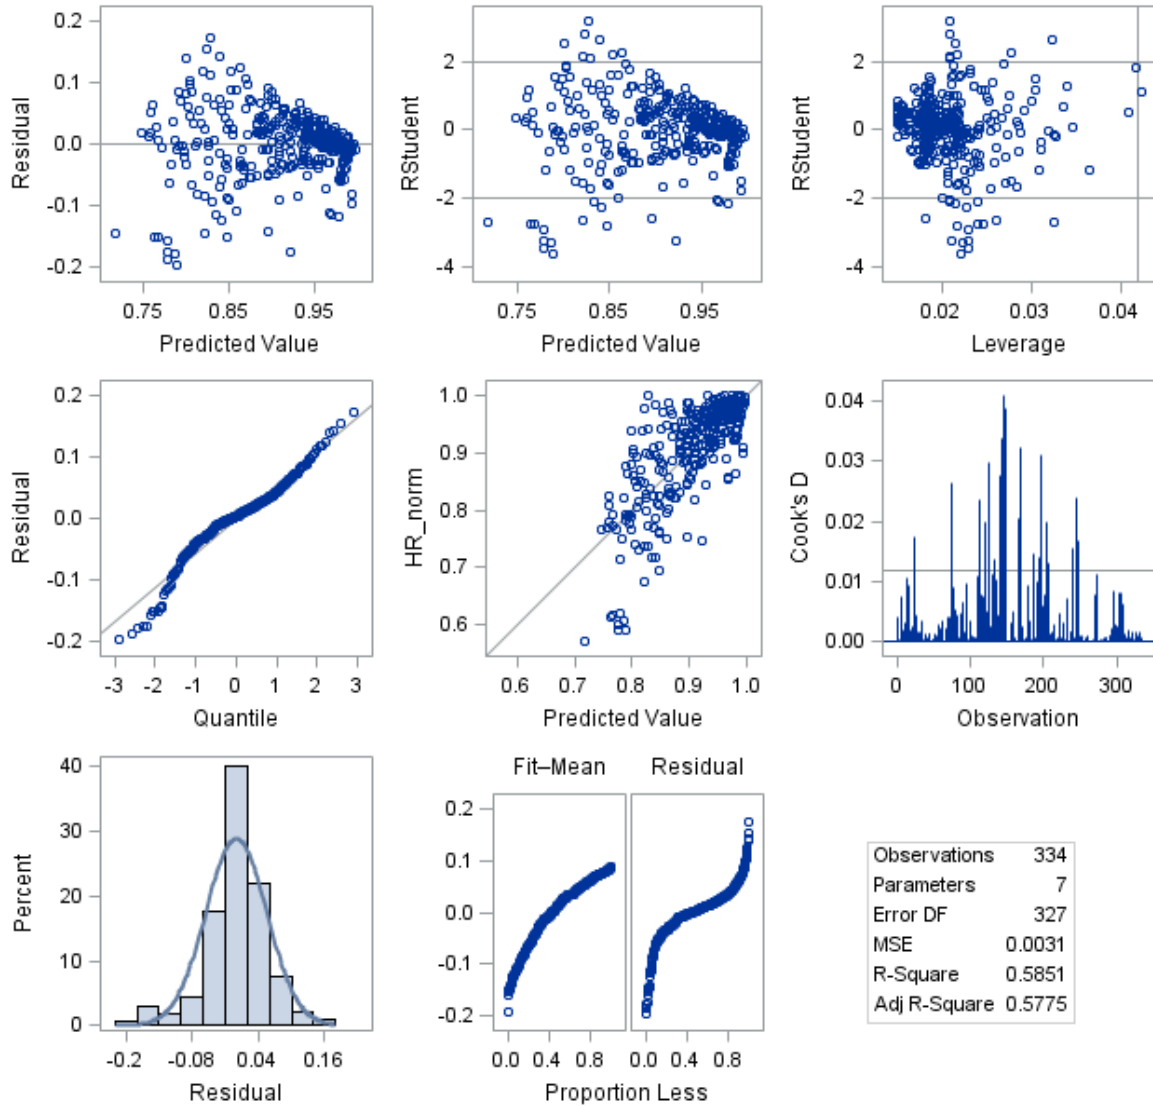



### Residual by Regressors for HR\_norm

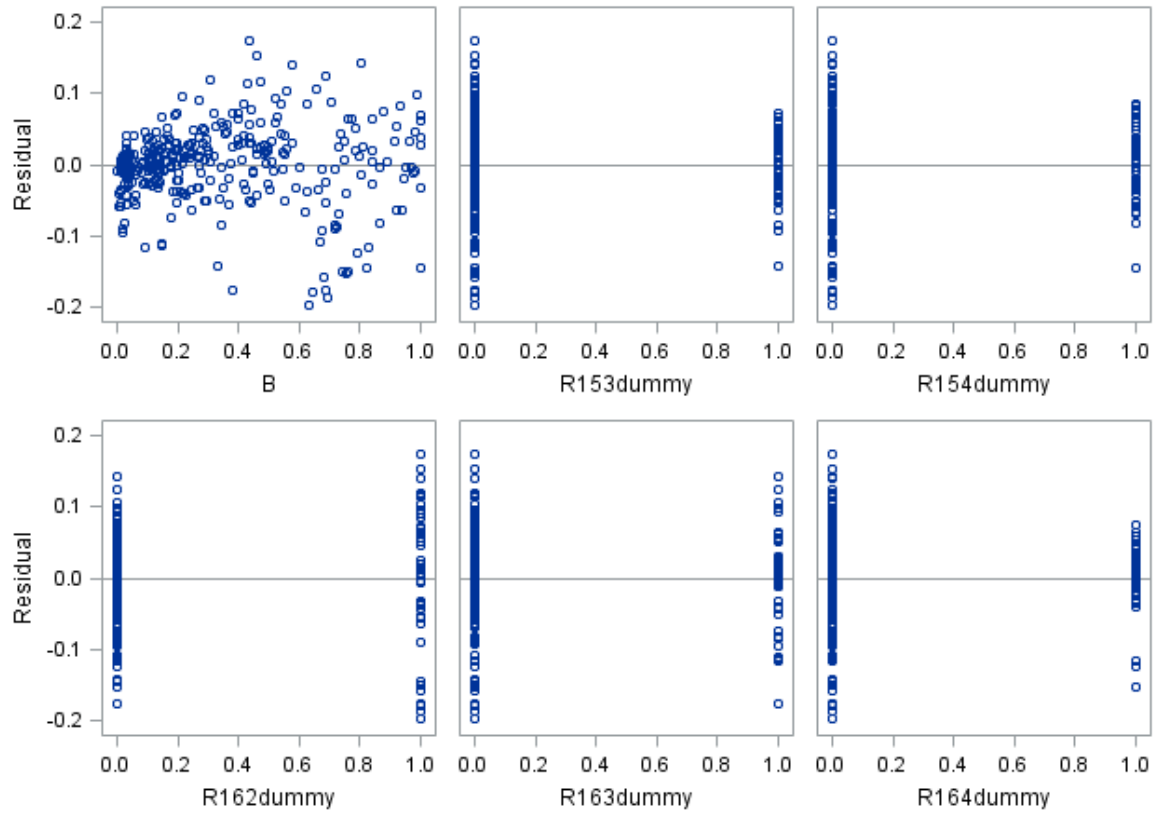

# The SAS System

The REG Procedure  
Model: MODEL1  
Dependent Variable: HR\_norm

|                             |     |
|-----------------------------|-----|
| Number of Observations Read | 334 |
| Number of Observations Used | 334 |

| Analysis of Variance |     |                |             |         |        |
|----------------------|-----|----------------|-------------|---------|--------|
| Source               | DF  | Sum of Squares | Mean Square | F Value | Pr > F |
| Model                | 6   | 0.66184        | 0.11031     | 20.17   | <.0001 |
| Error                | 327 | 1.78828        | 0.00547     |         |        |
| Corrected Total      | 333 | 2.45012        |             |         |        |

|                |         |          |        |
|----------------|---------|----------|--------|
| Root MSE       | 0.07395 | R-Square | 0.2701 |
| Dependent Mean | 0.90845 | Adj R-Sq | 0.2567 |
| Coeff Var      | 8.14031 |          |        |

| Parameter Estimates |    |                    |                |         |         |
|---------------------|----|--------------------|----------------|---------|---------|
| Variable            | DF | Parameter Estimate | Standard Error | t Value | Pr >  t |
| Intercept           | 1  | 0.96137            | 0.01044        | 92.04   | <.0001  |
| C                   | 1  | -0.08925           | 0.01473        | -6.06   | <.0001  |
| R153dummy           | 1  | -0.01955           | 0.01341        | -1.46   | 0.1460  |
| R154dummy           | 1  | 0.00566            | 0.01435        | 0.39    | 0.6937  |
| R162dummy           | 1  | -0.07741           | 0.01479        | -5.23   | <.0001  |
| R163dummy           | 1  | 0.02766            | 0.01401        | 1.98    | 0.0491  |
| R164dummy           | 1  | 0.01510            | 0.01388        | 1.09    | 0.2774  |

# The SAS System

The REG Procedure  
Model: MODEL1  
Dependent Variable: HR\_norm

## Fit Diagnostics for HR\_norm

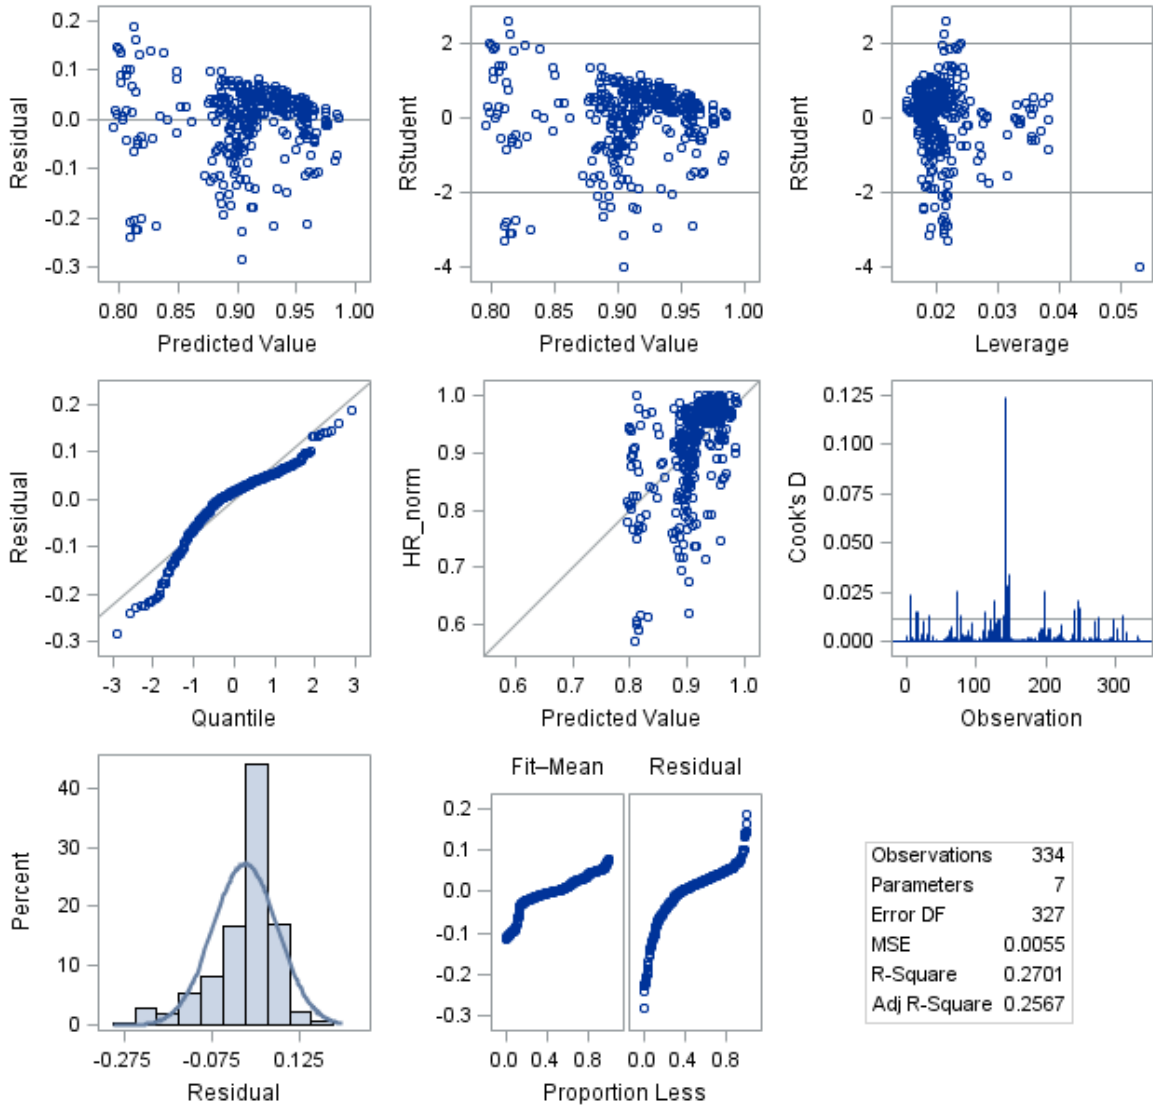

### Residual by Regressors for HR\_norm

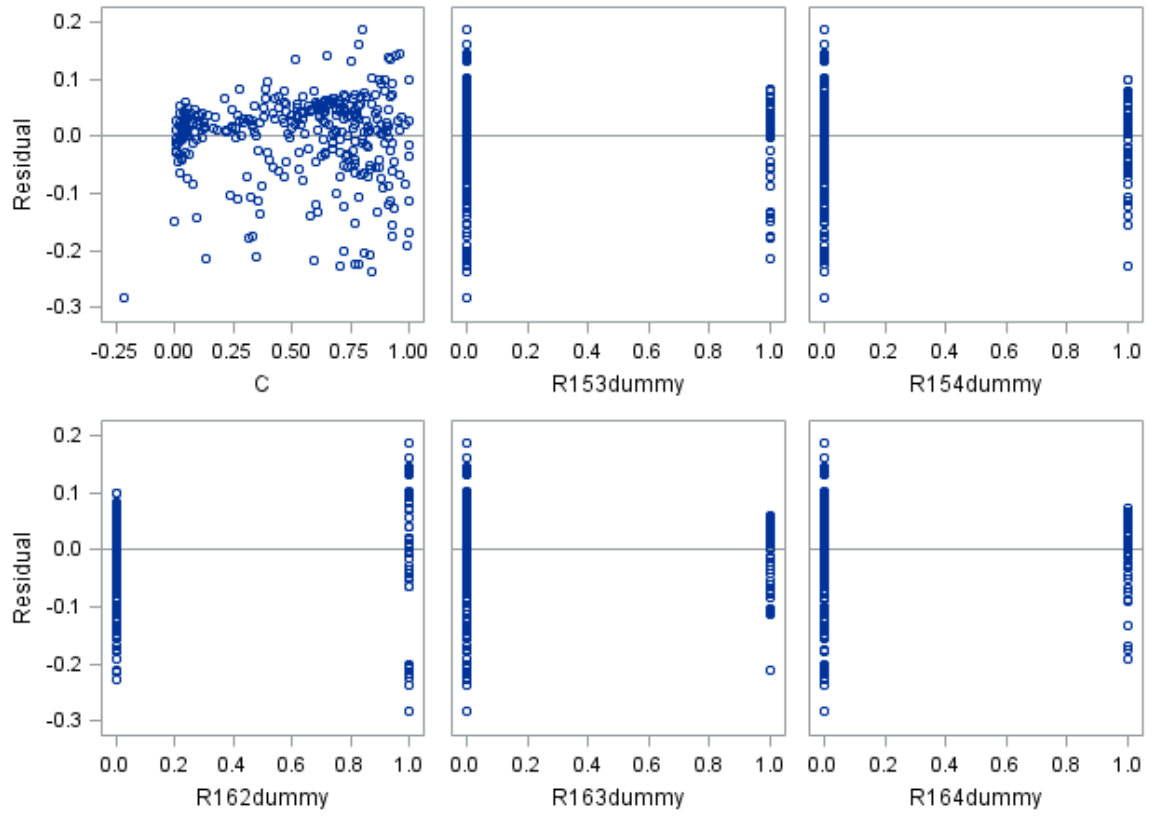

Supplement: 42234_2018_5_MOESM4_ESM.pdf [file 42234_2018_5_MOESM4_ESM.pdf]
